# 2 **From individuals to populations: How intraspecific competition shapes thermal reaction norms**

Short title: Competition and thermal reaction norms

4 François Mallard<sup>1,2</sup>, Vincent Le Boulot<sup>2</sup>, Christie Le Coeur<sup>1,3</sup>, Monique Avnaim<sup>1</sup>, Romain Péronnet<sup>1</sup>,  
David Claessen<sup>2#</sup>, Thomas Tully<sup>1\*</sup>.

6 1 - Institut d'écologie et des sciences de l'environnement de Paris

CNRS - UMR 7618, iEES Paris

8 Sorbonne Université

4 Place de Jussieu, 75005 Paris, France

10 2 - Institut de Biologie de l'ENS (IBENS)

Ecole Normale Supérieure,

12 46 rue d'Ulm, 75005 Paris, France

3 - Department of Biology

14 Vesilinnantie 5, Natura 2nd floor

FI-20014 University of Turku, Finland

16 \*Correspondence author: [thomas.tully@sorbonne-universite.fr](mailto:thomas.tully@sorbonne-universite.fr)

#deceased July 2018

## 18 **Abstract**

1. Most ectotherms follow the temperature-size rule (TSR): in cold environments individuals grow  
20 slowly but reach a large asymptotic length. Intraspecific competition can induce plastic changes  
of growth rate and asymptotic length and competition may itself be modulated by temperature.
2. Our aim is to disentangle the joint effects of temperature and intraspecific competition on  
22 growth rate and asymptotic length.
3. We used two distinct clonal lineages of the Collembola *Folsomia candida*, to describe thermal  
24 reaction norms of growth rate, asymptotic length and reproduction over 6 temperatures between  
6°C and 29°C. In parallel, we measured the long-term size-structure and dynamics of populations  
26 reared under the same temperatures to measure growth rates and asymptotic lengths in popula-  
tions and to quantify the joint effects of competition and temperature on these traits.
4. We show that intraspecific competition modulates the temperature-size rule. In dense popula-  
30 tions there is a direct negative effect of temperature on asymptotic length, but there is no temper-  
ature dependence of the growth rate, the dominant factor regulating growth being competition.  
We fail to demonstrate that the strength of competition varies with temperature except at the low-  
32 est temperature where competition is minimal. The two lineages responded differently to the joint  
effects of temperature and competition and these genetic differences have marked effects on  
34 population dynamics along our temperature gradient.
5. Our results reinforce the idea that the TSR response of ectotherms can be modulated by biotic  
36 and abiotic stressors when studied in non-optimal laboratory experiments. Untangling complex  
interactions between environment and demography will help understanding how size will respond  
38 to environmental change and how climate change may influence population dynamics.

## 40 **Keywords**

Body length, Collembola, Demography, Density-dependence, Growth Trajectory, Plasticity, Popu-  
42 lation Dynamic, Temperature Size Rule.

## **Introduction**

44 (Angilletta, 2009; Atkinson, 1996; Edeline, Lacroix, Delire, Poulet, & Legendre, 2013; Gil-  
loly, Brown, West, Savage, & Charnov, 2001). Thermal reaction norms of these traits have typic-  
46 ally unimodal asymmetric shapes: the trait's performance first increases more or less linearly with

increasing temperature, reaches a maximum at some optimal temperature and then decreases  
48 rapidly above this optimum (Kingsolver, 2009). Thermal reaction norms of asymptotic body length  
differ: most ectotherms follow the temperature-size rule (TSR), which states that adult body length  
50 decreases with increasing temperature despite an increase in average growth rate (Zuo, Moses,  
West, Hou, & Brown, 2011; DeLong, 2012; Gardner, Peters, Kearney, Joseph, & Heinsohn, 2011;  
52 Walters & Hassall, 2006; Angilletta, 2009; Daufresne, Lengfellner, & Sommer, 2009; Atkinson,  
1994). The TSR is defined within thermally favourable conditions (Atkinson, 1994), which is often  
54 viewed as the thermal range between a minimal and an optimal temperature (Walczyńska, Kieł-  
basa, & Sobczyk, 2016). Thus, most studies report measurements of reaction norms in optimal  
56 environments (including unlimited access to food resource) in order to avoid confounding indirect  
effects of temperature through density-dependence effects. Measurements are usually made on  
58 isolated individuals (Driessen, Ellers, & Van Straalen, 2007; Ellers & Driessen, 2011; Hoefnagel, de  
Vries, Jongejans, & Verberk, 2018), small cohorts (Karan, Morin, Moreteau, & David, 1998; Lief-  
60 Hoffmann, & Ellers, 2009; Karan et al., 1998; Lief-ting et al., 2009; Ghosh, Testa, & Shingleton,  
2013; Hoefnagel & Verberk, 2015) or growing populations with reduced density-dependence  
62 effects (Walczyńska et al., 2016) reared in the laboratory.

Natural insect populations are facing rapid temperature changes and there is need to understand  
64 and predict how populations will respond to these changes (Bewick, 2016). Yet, little is known on  
the robustness of the TSR predictions in a population context: as inter-individual interactions such  
66 competition might be thermally dependent, the picture becomes more complex. First, direct  
effects of temperature - such as the TSR - will affect demography: in ectotherms, warming accel-  
68 erates life cycles by increasing growth rates, by speeding up maturation, but also by shortening  
lifespan (Kelly, Zieba, Buttemer, & Hulbert, 2013; Kingsolver & Huey, 2008). In parallel, warming  
70 can lower fecundity by reducing adult body length. Second, indirect effects of temperature medi-  
ated by demography will alter individual responses. For example, the intensity of competitive in-  
72 teractions may vary with temperature (Gherardi, Coignet, Souty-Grosset, Spigoli, & Aquiloni, 2013;  
Nilsson-Örtman, Stoks, & Johansson, 2014). Understanding the link between competition and  
74 temperature can thus become crucial in order to predict both individuals' and populations' re-  
sponses to thermal variations. For example, studying the joint effects of temperature and in-  
76 traspecific competition is required to understand the relative dominance of coexisting ants spe-  
cies (Cerdá, Retana, & Manzaneda, 1998; Diamond et al., 2017; Bestelmeyer, 2000). Population  
78 dynamics of a bordered plant bug are also only explained when taking into account the joint effect

of temperature and food seasonal fluctuations together with density dependence effects (Johnson  
80 et al., 2015).

Intraspecific competition is one of the factors known to modulate populations' responses to tem-  
82 perature variation (Bassar, Letcher, Nislow, & Whiteley, 2016). Intra-specific competition is often  
characterised as a density-dependent process (such as food limitation) that can lead to large vari-  
84 ation in population sizes (Klomp, 1964). A recent study proposed two alternative hypotheses on  
the temperature-dependence of intraspecific competition in ectotherms (Amarasekare & Coutinho,  
86 2014). First, the strength of intraspecific competition can increase monotonically with temperat-  
ure. This is expected when resource requirements increase with temperature due to higher activity  
88 levels (Brown, Gillooly, Allen, Savage, & West, 2004; Ohlberger, Edeline, Vøllestad, Stenseth, &  
Claessen, 2011; Savage, Gillooly, Brown, West, & Charnov, 2004). In this scenario, direct and in-  
90 direct effects of temperature act synergistically: above a physiologically optimal temperature, dir-  
ect negative effects of warming will be amplified by a monotonically increasing strength of  
92 competition with increasing temperature. Alternatively, the strength of intraspecific competition  
can reach a maximum at intermediate temperature, near the optimal temperature for reproduction  
94 (such as in the example of the bordered plant bug in (Johnson et al., 2015)). The increase of re-  
source uptake required to maximize reproduction at intermediate temperatures strengthens the  
96 competition (Amarasekare & Coutinho, 2014). In this second scenario, direct and indirect effects  
will act antagonistically: above the thermal optimum, warming will have a direct negative effect  
98 but an indirect positive effect due to the loosening of the strength of competition with increasing  
temperature. This second scenario is expected to generate more complex demographic re-  
100 sponses (Amarasekare & Coutinho, 2014). Note that for temperatures below the optimal temperat-  
ure (where the TSR is defined), the two hypotheses have the same predictions as direct and indir-  
102 ect effects always acts antagonistically.

Our aim is to investigate how the effects of temperature on intraspecific competition affect the in-  
104 dividual's life history responses to temperature. We used the parthenogenetic Collembola *Folsomia*  
*candida* (Willem, 1902;) as an experimental model. We measured in parallel the responses of  
106 both isolated individuals and populations maintained at different temperatures. We compared two  
genetically distinct clonal lineages (labelled HA and TO) to study how within-species variations at  
108 individual level integrate with demography (Figure 1). These two lineages have two contrasted life  
history strategies along a slow (HA) - fast (TO) continuum (Mallard, Farina, & Tully, 2015; Tully &  
110 Ferrière, 2008) and may differ in their competitive abilities. Note that we only surveyed monoclonal

112 populations. Thus competition only occurred between individuals sharing the same genotype. We  
112 did not study how the two lineages interact with each other.

114 In this species, the strength of competition is expected to increase (i) with adult density because  
114 large individuals are known to monopolise most of the food resource through interference  
116 competition (Le Bourlot, Tully, & Claessen, 2014; Le Bourlot, 2014) and (ii) with the rate of repro-  
116 duction which reflects the resource requirements (Tully & Ferrière, 2008). Based on (i) we can anti-  
118 cipate that the temperature induced variations in competition intensity will be linked to the effect  
118 of temperature on adult density in populations. Based on (ii) we can expect that the strength of  
120 competition will be maximal at temperatures that are optimal for reproduction, which may differ  
120 between the two lineages.

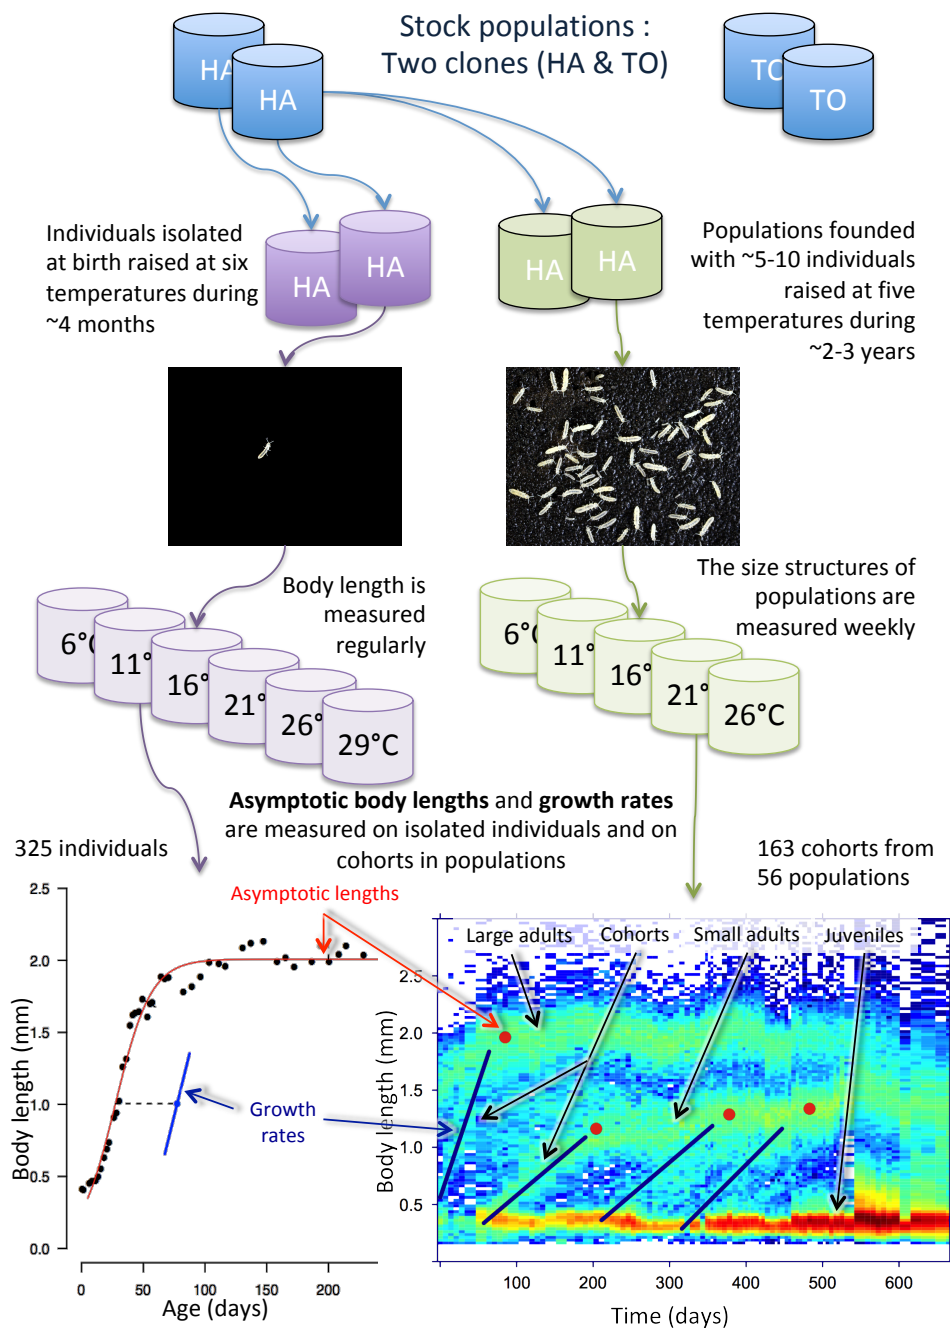

122 Figure 1: Experimental design. Two genetically different clonal lineages have been studied (HA & TO). Isolated individuals and populations have been maintained and studied at respectively six and five temperatures. Growth trajectories and long-term structure population dynamics (also called *structure time diagrams*) have been used to measure asymptotic body lengths and growth rates. Structure time diagrams display temporal dynamics of the populations' size-structure: for each time (x-axis) and size class (y-axis) coordinate, a colour rectangle is plotted whose hue refers to the number of individuals on a log scale (warmer colours are higher abundance). Dark blue lines are examples of some measurements of cohort growth rates. Red dots are estimates of the mean asymptotic length attained by these cohorts. Note that in some populations such as the one displayed here (HA maintained at 21°C), the size structure can be trimodal with two modes of adults coexisting with the mode of juveniles. In such cases, adult cohorts whose mean asymptotic body lengths remain below 1.5 mm are referred to as "small adults". See main text for details.

124

126

128

130

132

## Materials and methods

### 134 Experimental setup

We used the Collembola *Folsomia candida* - a small (~2 mm long) blind ametabolous hexapod -  
136 as a model organism to run experiments on both isolated individuals and populations. Details on  
rearing conditions and lineages used in experiments can be found in the Supporting Information  
138 section. Briefly, we followed individuals from two clonal lineages (labelled TO and HA) either isolated  
or in populations at six different temperatures (6°, 11°, 16°, 21°, 26° and 29°C). Individuals  
140 were followed from hatching until death and size-structure of populations was measured weekly  
for more than a year. Populations were kept long enough (several months or years) to allow them  
142 to regulate themselves with density dependence. Competition between individuals is therefore intense  
in these monoclonal populations. Populations are self-regulated by the resource - delivered  
144 weekly - that is kept constant over time and between temperatures. This resource became progressively  
limiting in every populations (i.e. no remaining food after a week) except at 6°C.

### 146 Measurements made on isolated individuals

**Reproduction.** Containers were regularly inspected for eggs in order to count the number of  
148 clutches and eggs laid by each individual (n=185) during the experiment (400 days). The total  
number of eggs laid by each individual was used as an overall measurement to determine optimal  
150 temperatures for reproduction (Figure 2A).

**Growth rate and asymptotic body length of isolated individuals.** During the first ten weeks of  
152 the experiment, individuals were measured three times per week. Then, after ten weeks, when  
their growth has slowed down, they were measured once a week. This was done until all individuals  
154 died (400 days, 95 % of the individuals died before 230 days). For each body length measurement,  
two to three pictures were taken using a digital camera (Nikon D300) fixed on a dissecting  
156 scope. Body length was measured on each picture using the ImageJ software (Abramoff, Magalhaes,  
& Ram, 2004) (<http://rsbweb.nih.gov/ij/>). More precisely, we measured the length from the  
158 front of the head to the rear of the abdomen on pictures taken from above such as the one visible  
on Figure 1. This measurement was done using the “segmented line selection tool”, after calibrating  
160 units with the “set scale” command. Smoothed splines growth curves were fitted to each individual  
growth trajectory (Figure 1) using the function *gcFitSpline* from the package *grofit* with a  
162 Gompertz type function. We adjusted the smoothness of the spline fit so as to generate estimates

of growth parameters that are comparable to the ones measured on populations (see Figure S1  
164 for details). Growth rates and asymptotic lengths were estimated from these fits (parameters  $\mu$   
and  $A$ ).

## 166 **Measurements made on cohorts in populations**

**Dynamics of the population size structure.** The population size structure was measured weekly  
168 during more than a year using a dedicated program. Each measurement gave us the number of  
individuals and, for each individual counted, its body length (mm). Given the number of Collem-  
170 bola in a box, and that individual marking is unattainable, it was not possible to measure the  
asymptotic body length and growth rate of an individual in a population. But we managed to ex-  
172 tract measurements of these life history traits in populations using the graphical representation for  
structured time series (Figure 1 and Figure S2) provided by the R package *STdiag* (Le Bourlot,  
174 Mallard, Claessen, & Tully, 2015). The examination of the structure time diagrams reveals many  
breakaway waves of density through time in populations (Figure 1). These waves of density -  
176 which we call "cohorts" - connect small to large individuals over time and result from the syn-  
chronised growth of a group of small Collembola within the group of larger individuals (See the  
178 "Cohort" in the bottom right panel of Figure 1 and for example the TO\_06\_r2 and TO\_06\_r4 popu-  
lations in Figure S2). We visually inspected the structure time diagrams of our 56 populations to  
180 identify 163 cohorts that are sufficiently contrasted graphically to be studied quantitatively (Figure  
1, Figure S2, Figure S3). Note that we did not take into account juveniles that, for different reas-  
182 ons, never managed to grow, or those that did not grow in a cohort and whose growth trajectories  
were thus invisible on graphs.

**184 Mean growth rate and asymptotic body length in populations.** We measured the mean growth  
rate and asymptotic body length of the 163 distinct cohorts that we identified. The black seg-  
186 ments on the structure-time diagram of Figure 1 (bottom right panel) shows how we measured the  
mean growth rate in the populations: it is the slope of a line adjusted through visible growing co-  
188 horts (waves). The asymptotic body length was estimated visually as the mode length of individu-  
als once the growing cohort had fully merged with pre-existing adults, or when the mode length of  
190 the growing cohort stabilizes (black dots on the structure-time diagram of Figure 1). Note that in  
some HA populations at 21°C, two modes of large individuals could be identified: some of the  
192 measured cohorts produced large fully-grown individuals (>1.5 mm) while others produced indi-  
viduals that stabilised their growth at smaller sizes (<1.5 mm, Figure S2 and Figure 3B). More de-



194 tails on these measurements are provided in Supporting Information section and in Figure S1.

**Measuring densities of large and small individuals.** Using the R package *STdiag*, we also extracted mean densities of adults and juveniles. More technical details can be found elsewhere (Le Bourlot et al., 2015) and in Supporting Information. Individuals are considered as juveniles if they are shorter than 0.3 mm and as large if they are longer than 0.9 mm based on the multimodal body length distributions in the populations (Figure S6). We use the term "adult" to designate large individuals in populations although it does not mean that they are all reproductive adults since we cannot measure the size at maturity in populations.

## 202 **Measuring joint effects of temperature and intraspecific competition in populations**

204 In populations, changes in growth rates and asymptotic body lengths are expected to be determined by direct effects of temperature (warming increases growth rate and downsizes body length) and by direct effects of intraspecific competition (density dependence). But temperature can also intervene through indirect effects by modifying the population density and the strength of intraspecific competition.

To study whether indirect effects of temperature (via competition) alter patterns seen at the individual level, we first compared isolated individuals with cohorts, without considering the effect of density within populations (Figure 3, Table 1, Table 2). We then took advantage of long-term variations of adult densities within populations (Figure 2B & Figure S2) to quantify the strength of competition for each combination of temperature and lineage (Figure 4, Table S1) and to study if, and how, the strength of competition changes with temperature (Figure 5A, B). The strength of intraspecific competition was estimated as the effect of the logarithm of adult density on the growth rate and asymptotic length (Table S1, Figure 2B).

To quantify the direct effects of temperature in populations, we controlled for density by scaling all populations as if adult densities in containers was constant and equal to 100 adults (Figure 5C, D). This corresponds to a density observed in almost every combination of lineages and temperatures (Figure 2B) and is close to the overall mean adult density observed in the populations (overall mean: 103 adults per container).

222 Lastly, to better visualize the joint effects of temperature and density on the two traits, we grouped the measurements made on isolated individuals ("adult density" of zero) and those made in populations at the different adult densities to draw a 3d contour plot using the function *stat\_contour*

from the *ggplot2* library (Figure S7).

## 226 **Statistical analysis**

All analyses were done with R 3.3.1 software <http://cran.r-project.org> (Ihaka & Gentleman, 1996)  
228 and we used the package *ggplot2* to produce the graphics (Wickham, 2009).

**Statistical models.** We used Gaussian linear models (*glm* function) to study the growth rate and  
230 asymptotic length. We started with full models with all dependent variables and their interactions  
and simplified these models by removing non-significant interactions. The factors lineage (the two  
232 clones) and temperature were included in the initial models. The effects and their interactions are  
tested with type 3 anova (*Anova* function from the package *car*). In statistical tables (Table 1, Table  
234 2, Table S1) we report in italics the tests corresponding to complex interactions that have been  
dropped from the full models and results of the type 3 anova on simplified models. We performed  
236 several complementary analyses on subsets of the whole datasets to better understand complex  
interactions and to perform specific comparisons. For instance, when we found one or several  
238 significant interactions between lineages and other variables, we performed some independent  
sub-analyses on each genetic line to better understand each of their specific responses.

240 **Temperature.** Temperature often had nonlinear effects. Thus in the statistical models we generally  
considered temperature as a categorical variable with 6 levels for isolated individuals and 5 levels  
242 for the populations (29°C missing) to avoid imposing a priori a parametric response. In some  
models, or for some specific comparisons, we sometimes considered the temperature as a con-  
244 tinuous variable when the response to temperature was visually linear (between 6° and 26°C for  
the growth rate of isolated individuals for instance, Figure 3A, B).

246 **Graphics.** We do not report values of estimates from the models in the tables but we refer to the  
graphics that have been designed to help understand and support the statistical analysis. Means  
248 and their 95% confidence intervals on figures, and log-linear relationships and their 95% confid-  
ence intervals in Figure 4 were estimated using saturated models including all the complex inter-  
250 actions. We used these saturated models to produce figures that reveal the data with minimal  
constraints (Tufté, 2001). Estimates and 95% confidence intervals of parameters of the saturated  
252 models are provided in Table S3.

## **Results**

254 **Temperature, reproduction and adult density.**

256 **Reproduction.** Cumulative reproduction of isolated individuals is reduced at the lowest temperat-  
258 ure extreme (6°C) and is absent at the highest one (29°C) for both lineages. At 6°C, growth is so  
260 slow that it takes more than 100 days for most individuals to reach maturity. At 29°C, the repro-  
262 ductive cessation could result from the asymptotic body lengths of individuals ( $\leq 1$ mm, see below)  
being smaller than the average size at maturity at 29°C (~1.2-1.4mm) (van Dooren, Tully, & Fer-  
rière, 2005). Between these extremes, the mean cumulative reproduction has an unimodal bell-  
shaped thermal response curve with a maximum reproduction reached at a lower temperature for  
TO (~16°C) than for HA (~21°C, Figure 2A). TO has on average a higher fecundity than HA (Figure  
2A, Figure S4A). For both lineages, the mean clutch size measured on the first 5 clutches de-  
264 creases with increasing temperature but TO lay larger clutches than HA (Figure S4A). On average,  
at low temperature, springtails lay larger clutches but less often than at warmer temperatures.

266 **Adult and juvenile density.** We counted on average 100 large individuals per population but this  
number ranged from less than 20 to more than 200 because of long-term fluctuations in popula-  
268 tions' densities and structures (Figure 2B, Figure S2). The average adult density is low at the two  
temperature extremes, and reaches a maximum between 11° and 21°C (Figure 2B). Adult densit-  
270 ies do not significantly differ between lineages. The density of juveniles is also variable within and  
across treatments. Below 21°C, TO populations bear on average more juveniles than HA (Figure  
272 S4B).

## A Cumulated fecundity

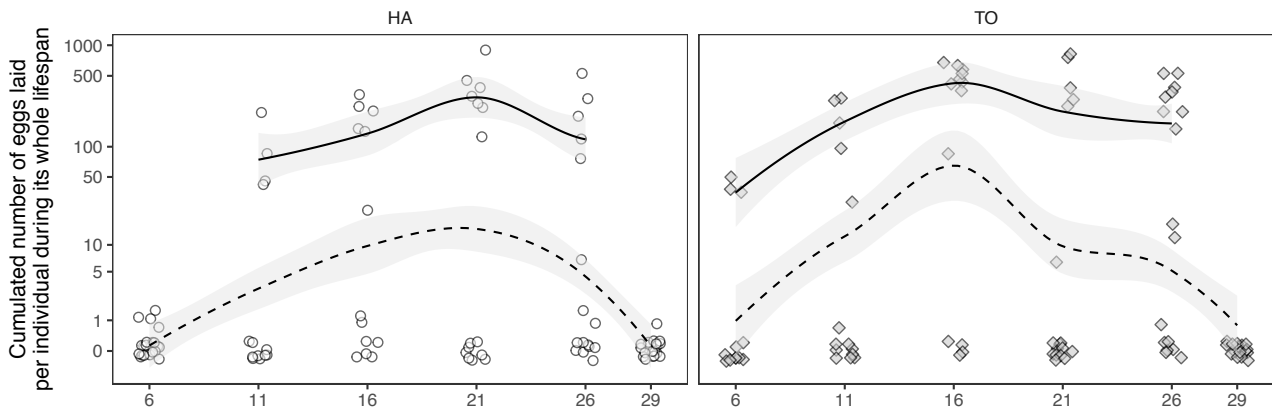

## B Adult density

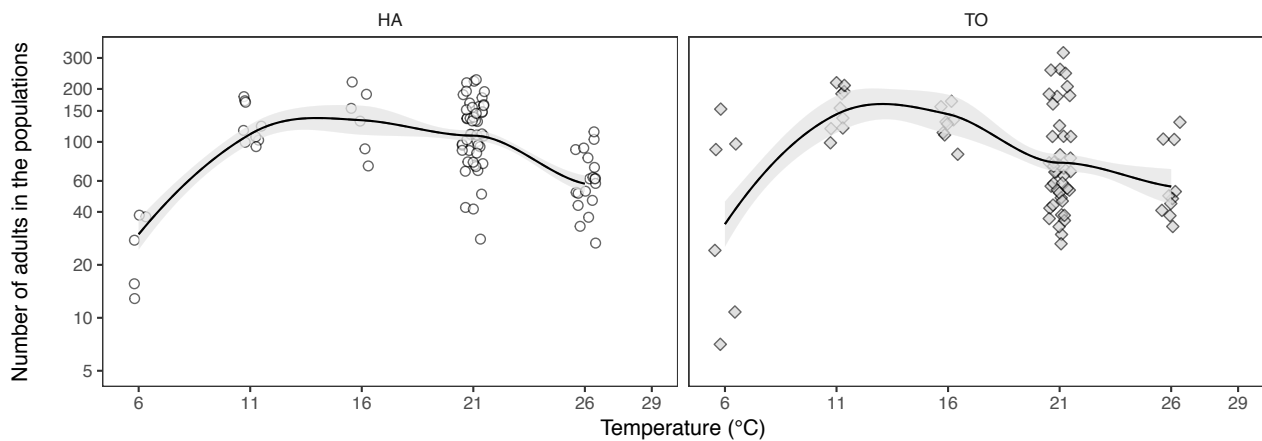

274 Figure 2: The effects of temperature on reproduction of isolated individuals (A) and on density in populations  
 276 (B) for lineages HA (open circle) and TO (grey diamonds). The panel A represents the total number of eggs  
 278 laid by an individual during its whole life. The straight line is a smooth function fitted on the reproductive adults  
 280 only excluding individuals that died before reproducing (fecundity higher than zero), while the dotted line is  
 adjusted on the whole dataset which includes individuals that did not reproduce. For both measurements,  
 the maximal reproduction peaks around 21°C for HA and around 16°C for TO. The panel B displays adult  
 densities measured in populations at the time of measurements of growth and asymptotic length (see meth-  
 ods for details). On average maximum adult densities are reached between 11°C and 21 °C.

## 282 The effect of temperature on growth rate

**Individuals versus populations.** A full model combining measurements made on isolated indi-  
 284 viduals and on cohorts shows that the growth rate is influenced by a complex interaction between  
 lineage identity, temperature and competition treatment (isolated individuals versus population)  
 286 and by an interaction between temperature and competition (Table 1A, Figure 3A): isolated indi-  
 viduals grew on average 4.2 time faster than cohorts in populations on the whole temperature  
 288 range but the difference between the two competition treatments was stronger for intermediate  
 temperatures (5.6 times faster at 16°C and 5.9 times faster at 26°C, Figure 3A). The average effect  
 290 of temperature on growth rates of isolated individuals (+2.74  $\mu\text{m}/\text{day}/^\circ\text{C}$ , average estimated over

the two lineages) is 8.7 times higher that the mean effect of temperature on growth rates in popu-  
 292 lations (+0.31  $\mu\text{m}/\text{day}/^\circ\text{C}$ , Figure 3A). We further split the data to examine the effects of temperat-  
 294 ure and lineage identity in each competition treatment separately (isolated individuals/  
 populations).

**Individuals.** Growth rates of isolated individuals depend on an interaction between lineage iden-  
 296 tity and temperature but, as expected, the effect of temperature was massive for both lineages  
 (Table 2A). Growth rates increase almost linearly with temperature (Figure 3A) between 6° and  
 298 26°C ( $2.56 \pm \text{SE. } 0002 \mu\text{m}\cdot\text{day}^{-1}\cdot^\circ\text{C}^{-1}$ , 95% CI: 2.22-2.29). They then drop between 26° and 29°C.  
 Both lineages have similar growth rates on the whole temperature range except at 26°C where TO  
 300 grows on average 30% faster than HA ( $t=4.06$ ,  $p = 0.0023$ ).

**A** Growth rate

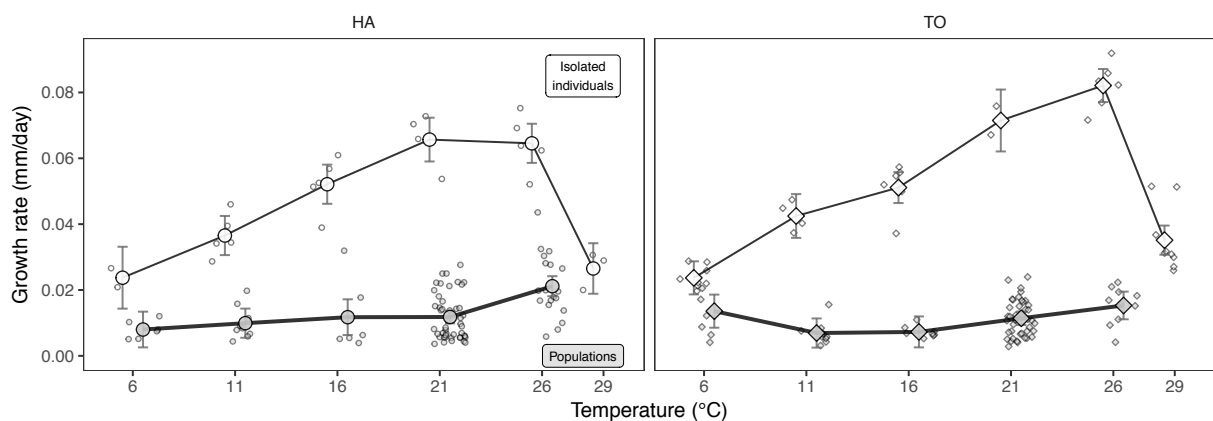

**B** Asymptotic body length

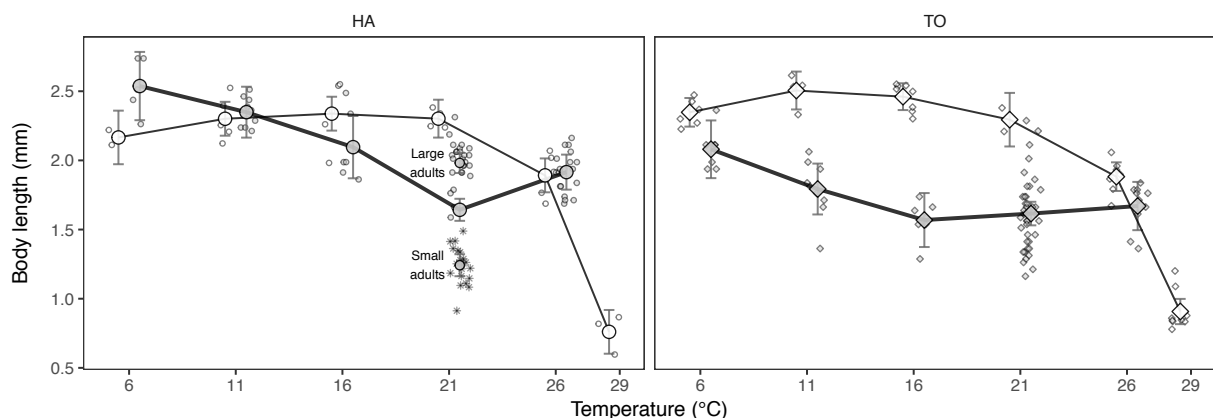

302 Figure 3: The thermal reaction norms of growth rate (A) and asymptotic body length (B) for lineages HA (left,  
 304 circles) and TO (right, diamonds). Means (and 95% confidence intervals) are plotted for each combination of  
 lineage identity, temperature and type of measurement (isolated individuals and cohorts in populations) to-  
 306 gether with the raw measurements. Open symbols and fine line are used for measurements made on isolat-  
 ed individuals and symbols filled with grey and thick solid lines are used for measurements made in popu-  
 308 lations. Asterisks are used to represent small adults observed in some HA populations at 21°C. Note that at  
 29°C we only plot measurements made on isolated individuals because we failed at maintaining populations  
 at 29°C since individuals do not reproduce at this temperature (Figure 2A).

310 **Populations.** Growth rates measured in populations did not differ between clonal lineages but  
varied slightly with temperature (Table 2B): on average, cohorts are growing 75% faster at 26°C  
312 than at the colder temperatures combined (contrast between 26°C and the four other temperat-  
ures  $F_{1,162} = 35.7$ ,  $p < 0.001$ ) while the growth is uniformly low over the four lower temperatures  
314 ( $F_{3,131} = 1.7$ ,  $p = 0.17$ ).

### The effect of temperature on asymptotic body length

316 **Individuals versus populations.** Using the whole dataset, we found that the asymptotic body  
length is affected by significant two-way interactions between competition (isolated individuals  
318 versus populations), lineage identity and temperature (Table 1B).

For HA, the asymptotic body length in population is very close to the length reached by isolated  
320 individuals except at 21°C where on average the small and large adults in populations are smaller  
than the isolated ones (Figure 3B, large adults  $\chi^2_1=16$ ,  $p < 0.001$ ). Thus, for HA, 21°C is the only  
322 tested temperature where the asymptotic length in populations is smaller than the asymptotic  
length of isolated individuals ( $-0.66\text{mm} \pm \text{SE} = 0.20$  in populations,  $\chi^2_1=10,7$ ,  $p = 0.001$ ).

324 Contrary to what was observed for HA, the asymptotic body length of TO in populations is signi-  
ficantly smaller than the asymptotic length of isolated individuals on the whole temperature range  
326 (comparisons for the five temperatures,  $\chi^2_1 > 8.4$ ,  $p < 0.04$ ). The difference between the two  
competition treatments is maximum at 16°C ( $-0.9\text{mm} \pm \text{SE} = 0.06$  in populations,  $\chi^2_1 = 233$ ,  $p$   
328  $< 0.001$ , Figure 3B).

**Individuals.** Lineage identity and temperature have additive effects on the asymptotic body length  
330 (Table 2C). On average isolated TO manage to reach a slightly larger asymptotic length than HA  
over the whole temperature range ( $+0.105 \text{ mm} \pm \text{SE} = 0.037$ ,  $\chi^2_1=8.0$ ,  $p = 0.005$ , Figure 3B). For the  
332 two clonal lineages, the asymptotic length of isolated individuals decreases non-linearly with tem-  
perature: the average length remains stable between 6° and 21°C ( $\chi^2_1 = 1.07$ ,  $p = 0.30$ ) and then  
334 decreases abruptly between 21° and 29°C (Figure 3B) which is outside the optimal thermal range  
given that growth no longer increases with increasing temperature above ~21-26°C (Figure 3A).  
336 Thus, given that the temperature size rule is expected to occur for non-stressful temperatures  
(Atkinson, 1994; Walczyńska et al., 2016; Hoefnagel et al., 2018), isolated individuals appear to  
338 slightly or even not really follow the TSR, especially HA since its mean asymptotic lengths remain  
roughly stable on its non-stressful thermal range.

340 **Populations.** Lineage and temperature have additive effects on the mean asymptotic length in

populations (Table 2D). Yet, HA that is on average larger than TO over the whole range of temperatures (+0.4 mm  $\pm$  SE = 0.03, Figure 3B). The mean asymptotic length declines regularly between 6° and 21°C for HA and between 6° and 16°C for TO ( $\sim$ -0.048 mm. $^{\circ}$ C $^{-1}$ ). Above these temperatures it either increases slightly (HA) or remains roughly constant (TO).

## The joint effects of temperature and density in populations

### 346 Growth rates

The full model that combines the two lineages shows that growth rates depend on two-ways interactions between lineage, temperature and adult density (Table S1 A). We further split the dataset to analyse separately the response of the two lineages (Table 1 B, C). We found that for both lineages growth rates of cohorts were determined by an additive effect of the adult density and the factor temperature (Table S1 B, C), which means that intraspecific competition (adult density on a log scale) had on average the same negative effect on growth rates for each temperature (Figure 4 A & Figure 5 A). For both lineages, the additive effect of temperature vanishes for temperatures above 6°C (Table S1 B, C). To better understand the biological meaning of the additive effect of temperature in populations for the two lineages (and its interaction with lineage identity in the main model Table S1 A), we plotted the predicted growth rates for the different temperatures in a virtual population where the adult density is fixed to 100 adults (Figure 5 C). This shows that, at this density, the growth rate is not influenced by temperature for TO but tends to decrease with increasing temperatures between 11° and 26°C for HA, although this change is not significant given the overlaps of the confidence intervals. Thus we conclude that at this adult density (100 ind.) the temperature has very limited direct effect on growth rates, which are mainly determined by the strength of intraspecific competition.

### Asymptotic body length

364 In the full model that combines the whole dataset, the asymptotic body length in populations is affected by two significant interactions, *temperature\*density* and *lineage identity\*temperature* (Table S1 D). The first interaction means that the strength of intraspecific competition changes with temperature, similarly for the two lineages. This is visible on the Figure 5 B, which reports estimated values of an unconstrained fully saturated model (the one with all possible interactions). Competition is minimal at 6°C (see also the flat relation in Figure 4 B at 6°C) and maximal at 11°C. It then decreases progressively as the temperature increases.

As for the growth rates, we used the full model to predict - and plot - the asymptotic body length

372 at the different temperatures in a population comprising 100 large individuals (Figure 5 D). This figure shows that the asymptotic body length decreases as temperature increases when the effect of  
 374 density is controlled ( $-0.024\text{mm}/^{\circ}\text{C} \pm \text{SE} = 0.002$  on average between  $6^{\circ}$  and  $26^{\circ}\text{C}$ ) and that TO is on average smaller than HA ( $-0.41\text{mm} \pm \text{SE} = 0.03$ ) over the temperature range. The significant interaction between temperature and adult density for TO (Table S1 F) is due to the better estimation of the strength of competition at  $6^{\circ}\text{C}$  compared to HA (Table S1 E) for which we had fewer  
 376 cohorts in populations raised at  $6^{\circ}\text{C}$  to estimate the asymptotic length.  
 378 cohorts in populations raised at  $6^{\circ}\text{C}$  to estimate the asymptotic length.

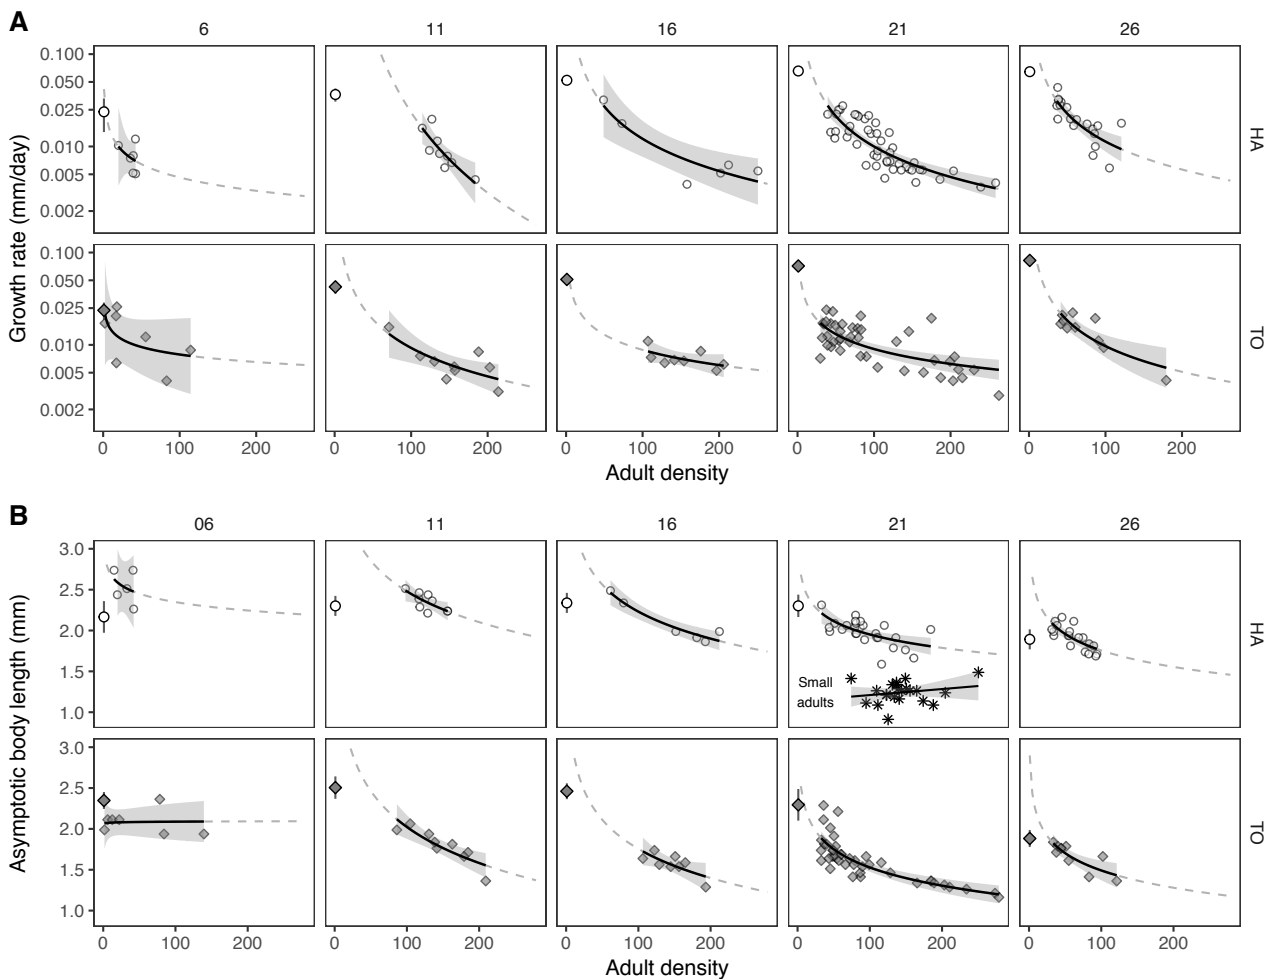

380 Figure 4: The joint effects of temperature (four columns of panels) and adult density (mean number of adults per container) on cohort growth rates (A) and asymptotic body length in populations (B) for the two lineages  
 382 HA (open circles) and TO (filled diamonds). On the left side of each panel the mean growth rate and asymptotic body lengths (95%CI) measured on isolated individuals (Figure 4 A and B) are plotted for comparisons.  
 384 Growth rates are plotted on a log10 scale. The function adjusted to the data is a linear fit of the form  $y=a+b*\log(x)$ ,  $x$  being the mean density of large adults at the time of the measurement. It is prolonged out of  
 386 the range of the data with a dotted curve. The size of the “small” adults observed in the HA populations at  $21^{\circ}\text{C}$  are plotted with asterisks.



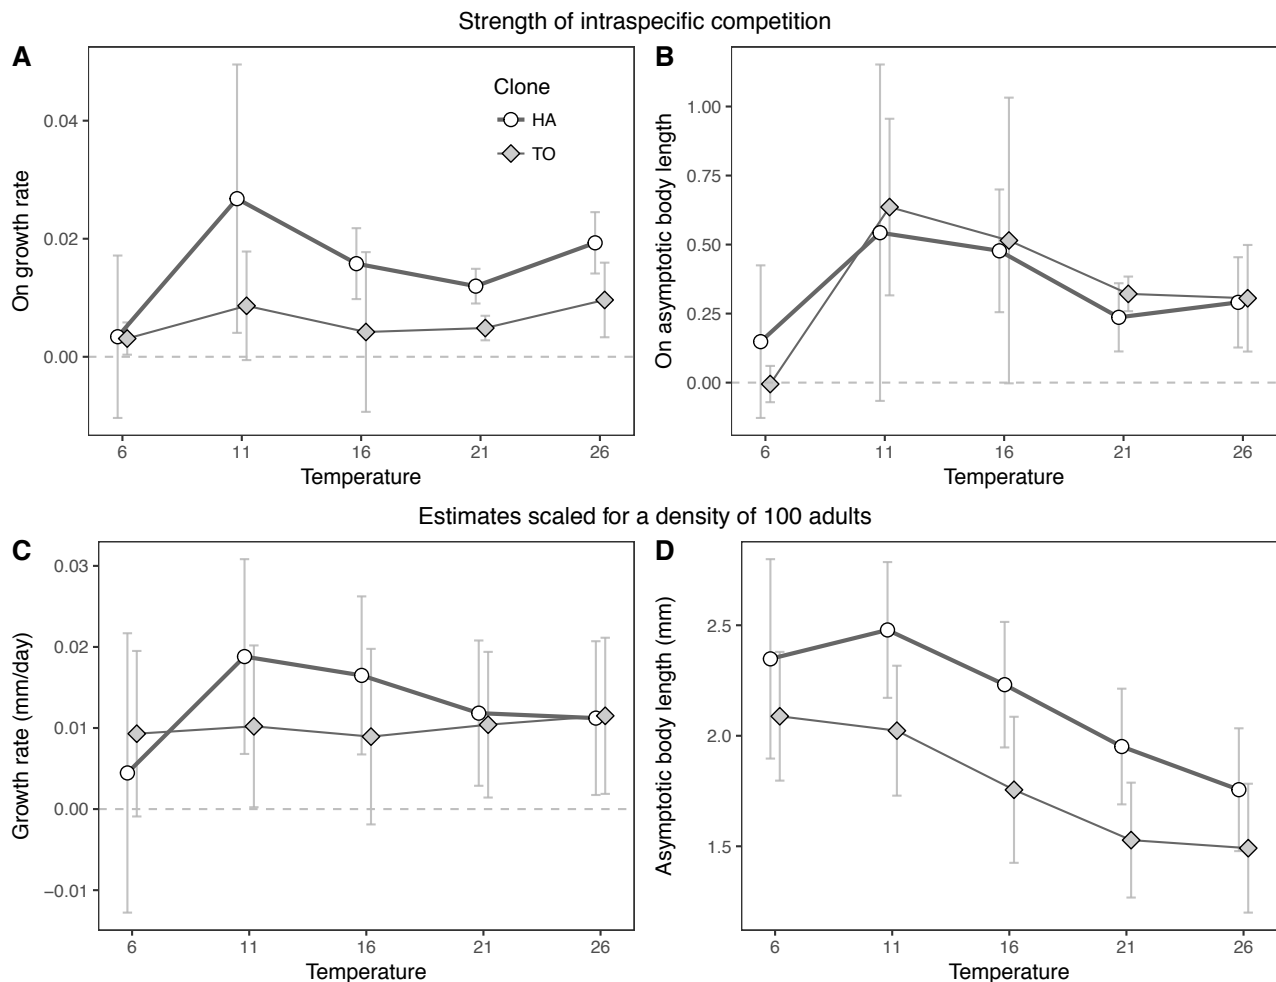

388

Figure 5: The strength of intraspecific competition within populations has been estimated as the slope (reversed to positive values) of the effect of adult density (log scale) on the growth rate (A) or asymptotic body length (B) estimated independently here for each lineage and temperature (mean  $\pm$  95% confidence intervals). To visually reveal the effect of temperature on the growth rate (C) and asymptotic body length (D) in populations while controlling for density we have plotted the predicted estimates of growth rate and body length for an adult density scaled at 100 individuals per box using an unconstrained linear model with an interaction between lineage and temperature.

### 396 **Analysing the contour plot**

Lastly, the Figure S7 combines all the measurements that we made on isolated individuals and in populations to better understand visually the joint and non-linear effects of competition (density) and temperature. For TO, the intraspecific competition has a negative effect on asymptotic length with an additive effect of temperature that remains on almost the whole range of conditions explored. For HA, the density has first a positive effect on asymptotic length: when the adult density increases, the collembola tend to reach a longer asymptotic body length. But when the density continues to increase (above 50 individuals per container), its effect becomes negative.

404 Note that when comparing isolated individuals to populations we found that asymptotic lengths of HA are marginally modified in populations (Figure 3B), which seems to be in contradiction with the

406 observed effect of intraspecific competition on this trait (Figure 5B). This is because density has  
first a positive effect on body length in this lineage (adults in small populations are larger than isolated  
408 individuals). This non-linear effect of density (visible on Figure 3B and Figure S7B) underlines  
the advantage of quantifying the strength of intraspecific competition by comparing populations  
410 with different densities rather than relying simply on the comparison of populations with isolated  
individuals since this would have led to conclude that competition has no effect on this trait.

## 412 Discussion

As observed on many other ectotherms (Angilletta, 2009; Atkinson, 1996; Kingsolver & Woods,  
414 1997), warmer conditions allow for faster collembola growth (Figure 3A, Figure 6) probably due to  
faster enzyme kinetics and increased food consumption (Angilletta, 2009). Despite this growth  
416 rate increase, the TSR only faintly applies: the isolated individuals maintained a large body length  
over a broad temperature range. A marked decrease in asymptotic body length was only detected  
418 above the optimal temperature range, where growth rates slow down and reproduction declines.  
Interestingly, in populations, the adult lengths decrease with increasing temperatures on the  
420 thermal range below the stressful warm temperatures (Figure 3B). This decrease is observed in  
both lineages and is even stronger when controlling for adult densities (Figure 5D). The decline in  
422 body length ( $-0.034\text{mm}/^{\circ}\text{C}$  on average which corresponds to  $\sim -1.7\%$  reduction in body length per  
 $^{\circ}\text{C}$  increase, Figure 5D) is within the range of values documented for terrestrial arthropods (Horne,  
424 Hirst, & Atkinson, 2015). Here, we only report asymptotic body length and the TSR might still apply  
to the size at maturity of *Folsomia candida* as it does for other Collembola species (Johnsen,  
426 2014). Indeed, Hoefnagel et al. (Hoefnagel et al., 2018) have shown that, in *Daphnia*, different temperature-dependent mechanisms are explaining the TSR for maturity and asymptotic body length.  
428 They show that growth stops at smaller sizes in warmer environments because resource limitation becomes stronger at higher temperature and for larger body sizes. Since food availability is the  
main factor limiting population growth in our experiments, it is also likely that the same reason  
430 triggers the TSR in our populations while we almost did not detect it for isolated individuals.  
Above  $26^{\circ}\text{C}$ , isolated individuals arrest growth much earlier: there was no difference between isolated  
432 individuals and adults in populations. This early growth arrest could result from secondary  
constraints such as thermal instability or from an abrupt decline of the assimilation efficiency over  
434  $\sim 21\text{-}26^{\circ}\text{C}$  (Kukal & Dawson, 1989; McConnachie & Alexander, 2004). It has also been suggested  
that increased mortality rates above the thermal optimum could act as a selection pressure to decrease  
436 size at maturity (Kozłowski, 2004). The observed temperature-induced length plasticity

438 may also be adaptive if the large individuals are more sensitive to heat stress than smaller ones.  
 More generally, a reduction in asymptotic body length is likely a general response to stressful en-  
 440 vironments in arthropods with continuous growth such as *Folsomia candida* or *Daphnia magna*  
 (Hoefnagel & Verberk, 2015). Some population structure-time diagrams also suggest that individu-  
 442 als can resume growth when the environmental conditions get better (a decrease in population  
 density see Figure S2 population "HA\_21\_r1" around day 200) and can also shrink if the environ-  
 444 ment deteriorates (data not shown). Further experiments are required to fully characterise the flex-  
 ibilities of growth and asymptotic size and to determine their adaptive values.

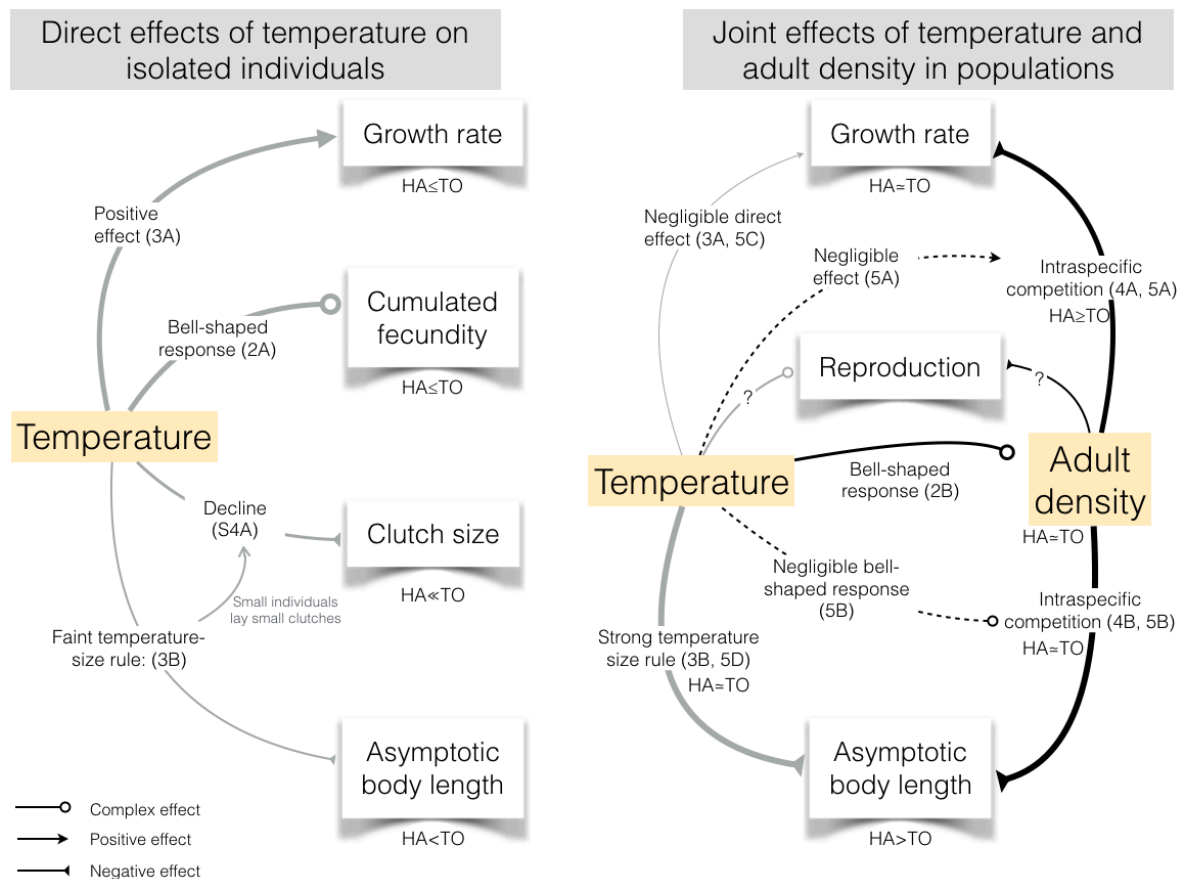

446  
 448 Figure 6: The direct and indirect effects of temperature on growth rates and asymptotic body lengths of isol-  
 450 ated individuals (left) and of cohorts of individuals within populations (right). References in parenthesis point  
 452 to figures. The line thickness underlines the relative strength of each effect. For example, adult density has a  
 454 strong direct negative effect on both growth rate and asymptotic body length while temperature has a negli-  
 gible direct effect on growth. Dotted lines represent the effects of temperature on the strength of intraspecific  
 competition. Grey lines represent direct effects of temperature on life-history traits and black lines the effects  
 linked with density in populations. Note that reproduction could not be measured in populations thus the  
 probable effects of density and temperature on reproduction are mentioned with a question mark on the right  
 side of the figure.

456 In the introduction, we discuss two scenarios for the temperature effect on intraspecific competi-  
 458 tion. Our results suggest that competition intensity is maximal at intermediate temperatures (Figure 2, Figure 5B) thus explaining differences between our lineages in their response to temperat-

ure in populations. As predicted by theory (Amarasekare & Coutinho, 2014), we observed that the  
460 temperatures at which TO and HA's reproduction is maximal (16°C and 21°C, Figure 2A) are also  
the ones where the two lineages reach their minimal asymptotic body lengths in populations (Fig-  
462 ure 3B). The existence of the trimodal adult size distributions at 21°C (Figure 2A) could also be in-  
terpreted as complex population dynamics under increased competition (Amarasekare &  
464 Coutinho, 2014), thus reinforcing our conclusion. After the establishment of a dense cohort of  
large adults, a second cohort can establish but at a smaller mean asymptotic length (see for in-  
466 stance population HA\_21\_11-16 in Figure S2). We have previously shown that large adults domi-  
nate smaller ones through intense interference competition (Le Bourlot et al., 2014) preventing  
468 them from growing further. A similar coexistence of different size classes of individuals has been  
shown in the lake perch (Persson et al., 2003). In this example, the population is alternatively  
470 dominated by stunted or giant individuals due to size-dependent cannibalism and intercohort  
competition. Here, our trimodal structures seem to persist as long as the dominant large adults re-  
472 main numerous enough but may only establish in a new colonised environment with initially re-  
duced competition for food. Finally, our measurements failed to detect any significant variation of  
474 the strength of competition on growth between 11° and 26°C (Figure 5A, B) as opposed to our  
findings on asymptotic length. Given the large confidence intervals (Figure 5), this discrepancy  
476 may be due to a lack of power to detect such a pattern. Indeed, the thermal responses shown in  
Figure 5B tend to support the idea that strength of competition is maximal at intermediate tem-  
478 peratures, despite large overlaps in confidence intervals. A similar result was described in the  
bordered plant bug, the effect of competition on fecundity was strongest at temperature optimal  
480 for reproduction (Johnson et al., 2015).

Overall, our study supports the idea that resource limitation is stronger for large individuals and at  
482 higher temperatures. At lower temperature, Hoefnagel et al. suggest that *Daphnia* might reach a  
"ceiling" asymptotic size that cannot be exceeded (Hoefnagel et al., 2018). While this might be the  
484 case for TO, we found that isolated HA individuals in optimal environments did not reach their  
highest possible size since larger asymptotic lengths are reached in populations. Assuming that  
486 the length reached by isolated individuals is optimal, exceeding this size will be associated with  
fitness costs. Conversely, these costs could be compensated by the advantageous of being  
488 among the largest individuals in populations. Under strong interference competition, giant indi-  
viduals are advantaged to access the food (Le Bourlot et al., 2014). Further theory is required to  
490 interpret our observations as we only observed this increase in length at the lowest temperatures

where densities and interference competition are low. Alternatively, the hoarding of nutritive re-  
492 sources by large adults in populations could serve as an 'insurance' to better face potential future  
degradation of the environment (Cuthill, Maddocks, Weall, & Jones, 2000) due for instance to re-  
494 source depletion triggered by increased local density.

Finally, our results reveal genetic differences between our clonal lineages in their mean trait values  
496 and plastic responses to both temperature and intra-specific competition (Figure 6). When isol-  
ated, TO grow on average faster than HA in the hottest environments ( $\geq 21^{\circ}\text{C}$ ) and reach a larger  
498 body length (Figure 3). This difference is referred as a vertical or "faster-slower" shift: a change in  
the overall height of the thermal performance curves. This vertical shift is opposed to an horizontal  
500 or "hotter-cooler" shift: the variation in the location of the thermal maximum or in the position of  
the curve along the temperature axis (Kingsolver, 2009). While previous studies have described  
502 similar effects of temperature on Collembola growth rates (Birkemoe & Leinaas, 2000; Driessen et  
al., 2007; Ellers, Mariën, Driessen, & van Straalen, 2008), or on sizes at maturity (Stam, de  
504 Leemkule, & Ernsting, 1996), we extend these results to asymptotic body lengths.

TO also produces on average larger clutches than HA (Figure S4A), grows faster between  $21^{\circ}$  and  
506  $26^{\circ}\text{C}$  and reaches slightly larger asymptotic lengths over the whole temperature range (Figure 6).  
These observations confirm that HA has a slow life history strategy compared to TO (Mallard et  
508 al., 2015; Tully & Ferrière, 2008) which remains true under a broad temperature range. Interest-  
ingly, we show that the faster lineage also exhibit the stronger TSR response in population. A sim-  
510 ilar result has been shown in a multi-species comparison (Horne et al., 2015): multivoltine arthro-  
pods exhibit a steeper decrease in size with increasing temperature than univoltine ones. We also  
512 found that the optimal temperature is higher for HA than TO when looking at reproduction, but not  
when looking at growth. The significance of this discrepancy remains to be studied.

514 In populations, the genetic difference in growth rates vanishes and the genetic difference in  
asymptotic body lengths reverses: adults TO are much smaller than HA over the whole temperat-  
516 ure range. This reduction and reversal of genetic differences from one environment to another  
might result from genetic difference in resource acquisition, resource assimilation or from differ-  
518 ences in resource allocation. Indeed, the lineages differ in their ability to invest into reproduction  
(Figure 2A, B, Tully & Ferrière, 2008). The fast lineage (TO) may require more nutritional resources  
520 to grow faster while reaching larger size and reproducing more than the slow one (HA). In *Daphnia*,  
genetic diversity in resource allocation can generate differences in body size and age at maturity  
522 (Hoefnagel et al., 2018). When food becomes scarce in populations due to intraspecific competi-

tion, the gap between the resource requirement and its availability may become especially large  
524 for TO. The individuals would then be constrained to reduce the resource allocated to growth to  
favour reproduction which may result in the comparatively large number of juveniles observed in  
526 the TO populations (Figure S4B). TO may also have an increased resource intake (which is ad-  
vantageous when the resource is unlimited) but a lower assimilation efficiency, resulting in smaller  
528 average sizes in populations where the resources become limiting. Together, our observations  
support the idea of genetic variation in the fraction of resource allocated to reproduction and  
530 growth (De Jong & van Noordwijk, 1992). Further work is needed to study whether this genetic  
variation in resource allocation is linked to a putative variation in resource acquisition and assimil-  
532 ation efficiency and more specifically to examine whether it is advantageous for organism with rel-  
atively low assimilation efficiency (TO vs. HA or large vs. small individuals) to slow growth and in-  
534 vest more in reproduction when resources become scarce.

To conclude, our study provides evidence for within-species genetic variation in thermal reaction  
536 norms and in plastic responses to intraspecific competition. By providing a quantitative analysis  
of the way growth rates and asymptotic lengths change according to temperature and density in a  
538 population context, we stress the need for untangling the complex interactions between environ-  
ment and demography. Our results reinforce the idea that the TSR response of ectotherms can be  
540 modulated by biotic and abiotic stressors when studied in non-optimal laboratory experiments.

## Acknowledgements

542 We thank two anonymous referees for their constructive comments that helped us to refine and  
clarify the manuscript.

544 We would like to pay tribute to David Claessen's memory. He left us in July 2018 and we are  
deeply sorrow for the loss of an unforgettable friend and such a brilliant colleague. We are grateful  
546 for his contribution to this work.

## Authors' contributions

548 FM, VLB, TT conceived the ideas and designed methodology. FM, VLB, CLC, MA, RP and TT col-  
lected the data. FM, VLB, TT analysed the data. FM and TT led the writing of the manuscript. VLB  
550 DC and CLC participated to the writing of the manuscript.

All authors contributed critically to the drafts and gave approval for publication.

## 552 Tables

554 Table 1: The two models of this table have been done to study whether indirect effects of temperature (via  
 555 competition) alter patterns seen at the individual level. Model A (growth rate) is associated with the Figure  
 556 3A and model B (asymptotic length) with Figure 3B. In both models, the variable *lineage* has two levels (HA,  
 557 TO), *temperature* has 5 levels (29°C is not included since we have no population at this temperature) and  
 558 the variable *competition* is used to tell the difference between measurements made on isolated individuals  
 559 with the ones made on populations. Non-significant interactions that have been dropped from initial full  
 560 models are shown in italics. Effects and their interactions are tested with likelihood ratio tests using a type 3  
 anova (*Anova* function from the *car* package). Parameters of full models A and B are provided in Table S3.

|     | Factors                                | Likelihood ratio Chi-square | Df | P (>Chisq) |
|-----|----------------------------------------|-----------------------------|----|------------|
| 562 | <b>(A) Growth rate</b>                 |                             |    |            |
|     | Lineage (HA/TO)                        | 2.3                         | 1  | 0.13       |
| 564 | Temperature (factor)                   | 35.9                        | 4  | <0.001     |
|     | Competition (isolated/population)      | 8.5                         | 1  | 0.003      |
| 566 | Temperature*Competition                | 50.6                        | 4  | <0.001     |
|     | Lineage*Competition                    | 0.76                        | 1  | 0.38       |
| 568 | Lineage*Temperature                    | 8.1                         | 4  | 0.09       |
|     | Temperature*Lineage*Competition        | 16.1                        | 4  | 0.0028     |
| 570 | <b>Growth rate for HA</b>              |                             |    |            |
|     | Temperature (factor)                   | 27.2                        | 4  | <0.001     |
| 572 | Competition (isolated > population)    | 6.5                         | 1  | 0.011      |
|     | Temperature*Competition                | 38.3                        | 4  | <0.001     |
| 574 | <b>Growth rate for TO</b>              |                             |    |            |
|     | Temperature (factor)                   | 17.2                        | A  | 0.002      |
| 576 | Competition (isolated > population)    | 12.4                        | 1  | <0.001     |
|     | Temperature*Competition                | 237.1                       | 4  | <0.001     |
| 578 |                                        |                             |    |            |
|     | <b>(B) Asymptotic body length</b>      |                             |    |            |
| 580 | Lineage (HA/TO)                        | 9.4                         | 1  | <0.001     |
|     | Temperature (factor)                   | 99.4                        | 4  | <0.001     |
| 582 | Competition (isolated/population)      | 3.1                         | 1  | 0.09       |
|     | Temperature*Competition                | 35.0                        | 4  | <0.001     |
| 584 | Lineage*Competition                    | 22.2                        | 1  | <0.001     |
|     | Lineage*Temperature                    | 19.6                        | 4  | <0.001     |
| 586 | <i>Temperature*Lineage*Competition</i> | 8.6                         | 4  | 0.07       |
|     | <b>Asymptotic body length for HA</b>   |                             |    |            |
| 588 | Temperature (factor)                   | 78.3                        | 4  | <0.001     |
|     | Competition (isolated~population)      | 2.1                         | 1  | 0.14       |
| 590 | Temperature*Competition                | 17.8                        | 4  | 0.001      |
|     | <b>Asymptotic body length for TO</b>   |                             |    |            |
| 592 | Temperature (factor)                   | 37.7                        | 4  | <0.001     |
|     | Competition (isolated > population)    | 6.2                         | 1  | 0.012      |
| 594 | Temperature*Competition                | 32.8                        | 4  | <0.001     |

596 Table 2: This table represents the best selected linear models that we used to study effects of lineage (HA  
 598 and TO) and temperature (as a factor) on growth rate (A, B, Figure 3A) and asymptotic size (C, D, Figure 3B)  
 600 measured either on isolated individuals (A, C, Figure 3 open symbols and thin line) or in populations (B, D,  
 602 Figure 3, filled symbols and thick lines). Small and large HA adults at 21°C are taken into account in the  
 model. Interactions that have been dropped from initial full models are italicized. Effects and their interac-  
 tions are tested with likelihood ratio tests using a type 3 anova (*Anova* function from the *car* package). We  
 also report the effects of temperature tested independently for the two clones for models A and D since the  
 interaction between lineage and temperature was significant.

| Factors                                                     | Likelihood ratio Chi-square | Df | P (>Chisq) |
|-------------------------------------------------------------|-----------------------------|----|------------|
| <b>(A) Growth rate of isolated individuals</b>              |                             |    |            |
| Lineage (HA/TO)                                             | 0.00                        | 1  | 0.99       |
| Temperature (factor)                                        | 116.6                       | 5  | <0.001     |
| Lineage*Temperature (6-16°:HA=TO; 21-29°:HA<TO)             | 11.9                        | 5  | 0.035      |
| Temperature (HA only)                                       | 102                         | 5  | <0.001     |
| Temperature (TO only)                                       | 322                         | 5  | <0.001     |
| <b>(B) Growth rate in populations</b>                       |                             |    |            |
| Lineage (HA=TO)                                             | 2.3                         | 1  | 0.13       |
| Temperature (factor)                                        | 35.8                        | 4  | <0.001     |
| <i>Lineage*Temperature</i>                                  | 8.08                        | 4  | 0.089      |
| <b>(C) Asymptotic body length of isolated individuals</b>   |                             |    |            |
| Lineage (HA<TO)                                             | 8.0                         | 1  | 0.0047     |
| Temperature (factor)                                        | 1105                        | 5  | <0.001     |
| <i>Lineage*Temperature</i>                                  | 4.9                         | 5  | 0.42       |
| <b>(D) Asymptotic body length of cohorts in populations</b> |                             |    |            |
| Lineage (HA>TO)                                             | 7.8                         | 1  | 0.005      |
| Temperature (factor)                                        | 91                          | 4  | <0.001     |
| Lineage*Temperature                                         | 23.2                        | 4  | <0.001     |
| Temperature (HA only)                                       | 69.0                        | 4  | <0.001     |
| Temperature (TO only)                                       | 30.6                        | 4  | <0.001     |



## References

- 630 Abramoff, M. D., Magalhaes, P. J., & Ram, S. J. (2004). Image processing with ImageJ. *Biophotonics international*, 11(7), 36-42.
- 632 Amarasekare, P., & Coutinho, R. M. (2014). Effects of temperature on intraspecific competition in ectotherms. *The American Naturalist*, 184(3), E50-E65. doi:10.1086/677386
- 634 Angilletta, M. (2009). *Thermal adaptation : a theoretical and empirical synthesis*. Oxford; New York: Oxford University Press.
- 636 Atkinson. (1996). Ectotherm life-history responses to developmental temperature. *Animals and temperature: Phenotypic and evolutionary adaptation*, 183-204.
- 638 Atkinson, D. (1994). Temperature and Organism Size--A Biological Law for Ectotherms? *Advances in ecological research*, 25, 1-58.
- 640 Bassar, R. D., Letcher, B. H., Nislow, K. H., & Whiteley, A. R. (2016). Changes in seasonal climate outpace compensatory density-dependence in eastern brook trout. *Glob Chang Biol*, 22(2),  
642 577-593. doi:10.1111/gcb.13135
- Bestelmeyer, B. T. (2000). The trade-off between thermal tolerance and behavioural dominance in  
644 a subtropical South American ant community. *Journal of Animal Ecology*, 69(6), 998-1009. Retrieved from <https://onlinelibrary.wiley.com/doi/pdf/10.1111/j.1365-2656.2000.00455.x>
- 646 Bewick, S. (2016). Current and future challenges of predictive insect population modelling. *Functional Ecology*, 30(7), 1028-1029. doi:10.1111/1365-2435.12678
- 648 Birkemoe, T., & Leinaas, H. P. (2000). Effects of temperature on the development of an arctic Collembola (*Hypogastrura tullbergi*). *Functional Ecology*, 14(6), 693-700.
- 650 Brown, J. H., Gillooly, J. F., Allen, A. P., Savage, V. M., & West, G. B. (2004). Toward a metabolic theory of ecology. *Ecology*, 85(7), 1771-1789.
- 652 Cerdá, X., Retana, J., & Manzaneda, A. (1998). The role of competition by dominants and temperature in the foraging of subordinate species in Mediterranean ant communities. *Oecologia*, 117(3),  
654 404-412. Retrieved from [http://digital.csic.es/bitstream/10261/65264/1/the\\_role.pdf](http://digital.csic.es/bitstream/10261/65264/1/the_role.pdf)
- Cuthill, I. C., Maddocks, S. A., Weall, C. V., & Jones, E. K. M. (2000). Body mass regulation in re-

- 656 sponse to changes in feeding predictability and overnight energy expenditure. *Behavioral Ecology*,  
11(2), 189-195. Retrieved from <https://academic.oup.com/beheco/article/11/2/189/204730>
- 658 Daufresne, M., Lengfellner, K., & Sommer, U. (2009). Global warming benefits the small in aquatic  
ecosystems. *Proceedings of the National Academy of Sciences*, 106(31), 12788-12793.
- 660 De Jong, G., & van Noordwijk, A. J. (1992). Acquisition and allocation of resources: genetic  
(co)variances, selection, and life histories. *The American Naturalist*, 139(4), 749-770.
- 662 DeLong, J. P. (2012). Experimental demonstration of a 'rate-size' trade-off governing body size  
optimization. *Evolutionary Ecology Research*, 14(3), 343-352.
- 664 Diamond, S. E., Chick, L., Penick, C. A., Nichols, L. M., Cahan, S. H., Dunn, R. R., . . . Gotelli, N.  
J. (2017). Heat tolerance predicts the importance of species interaction effects as the climate  
666 changes. *Integr Comp Biol*, 57(1), 112-120. doi:10.1093/icb/icx008
- Driessen, G., Ellers, J., & Van Straalen, N. M. (2007). Variation, selection and heritability of thermal  
668 reaction norms for juvenile growth in *Orchesella cincta* (Collembola : Entomobryidae). *European  
Journal of Entomology*, 104(1), 39-46.
- 670 Edeline, E., Lacroix, G., Delire, C., Poulet, N., & Legendre, S. (2013). Ecological emergence of  
thermal clines in body size. *Glob Chang Biol*, 19(10), 3062-3068. doi:10.1111/gcb.12299
- 672 Ellers, J., & Driessen, G. (2011). Genetic correlation between temperature-induced plasticity of  
life-history traits in a soil arthropod. *Evolutionary Ecology*, 25(2), 473-484. doi:10.1007/  
674 s10682-010-9414-1
- Ellers, J., Mariën, J., Driessen, G., & van Straalen, N. M. (2008). Temperature-induced gene ex-  
676 pression associated with different thermal reaction norms for growth rate. *J Exp Zool B Mol Dev  
Evol*, 310(2), 137-147. doi:10.1002/jez.b.21194
- 678 Fountain, M. T., & Hopkin, S. P. (2005). *Folsomia candida* (Collembola): a "standard" soil arthro-  
pod. *Annual Review of Entomology*, 50, 201-222. doi:10.1146/annurev.ento.50.071803.130331
- 680 Gardner, J. L., Peters, A., Kearney, M. R., Joseph, L., & Heinsohn, R. (2011). Declining body size: a  
third universal response to warming? *Trends Ecol Evol*, 26(6), 285-291. doi:10.1016/  
682 j.tree.2011.03.005
- Gherardi, F., Coignet, A., Souty-Grosset, C., Spigoli, D., & Aquiloni, L. (2013). Climate warming  
684 and the agonistic behaviour of invasive crayfishes in Europe. *Freshwater Biology*, 58(9),  
1958-1967. doi:10.1111/fwb.12183

- 686 Ghosh, S. M., Testa, N. D., & Shingleton, A. W. (2013). Temperature-size rule is mediated by  
thermal plasticity of critical size in *Drosophila melanogaster*. *Proc Biol Sci*, 280(1760), 20130174.  
688 doi:10.1098/rspb.2013.0174
- Gillooly, J. F., Brown, J. H., West, G. B., Savage, V. M., & Charnov, E. L. (2001). Effects of size and  
690 temperature on metabolic rate. *Science*, 293, 2248-2251. doi:10.1126/science.1061967
- Hoefnagel, K. N., & Verberk, W. C. E. P. (2015). Is the temperature-size rule mediated by oxygen in  
692 aquatic ectotherms? *J Therm Biol*, 54, 56-65. doi:10.1016/j.jtherbio.2014.12.003
- Hoefnagel, K. N., de Vries, E. H. J. L., Jongejans, E., & Verberk, W. C. E. P. (2018). The temperat-  
694 ure-size rule in *Daphnia magna* across different genetic lines and ontogenetic stages: Multiple  
patterns and mechanisms. *Ecol Evol*, 8, 3828-3841. doi:10.1002/ece3.3933
- 696 Horne, C. R., Hirst, A. G., & Atkinson, D. (2015). Temperature-size responses match latitudinal-  
size clines in arthropods, revealing critical differences between aquatic and terrestrial species.  
698 *Ecol Lett*, 18(4), 327-335. doi:10.1111/ele.12413
- Ihaka, R., & Gentleman, R. (1996). R: A Language for Data Analysis and Graphics. *Journal of*  
700 *Computational and Graphical Statistics* 5: 299. doi: 10.2307/1390807.
- Johnsen, J. (2014). The thermal effects on selected life history traits in an arctic and a temperate  
702 population of the Collembola *Hypogastrura viatica*. Master Thesis. University of Oslo, Oslo.
- Johnson, C. A., Coutinho, R. M., Berlin, E., Dolphin, K. E., Heyer, J., Kim, B., . . . Amarasekare, P.  
704 (2015). Effects of temperature and resource variation on insect population dynamics: the bordered  
plant bug as a case study. *Functional Ecology*, 30(7), 1122-1131. doi:10.1111/1365-2435.12583
- 706 Karan, D., Morin, J. P., Moreteau, B., & David, J. R. (1998). Body size and developmental temper-  
ature in *Drosophila melanogaster*: analysis of body weight reaction norm. *Journal of thermal bio-*  
708 *logy*, 23(5), 301-309.
- Kelly, M. A., Zieba, A. P., Buttemer, W. A., & Hulbert, A. J. (2013). Effect of temperature on the rate  
710 of ageing: an experimental study of the blowfly *Calliphora stygia*. *PLoS One*, 8(9), e73781.  
doi:10.1371/journal.pone.0073781
- 712 Kingsolver, J. G., & Huey, R. B. (2008). Size, temperature, and fitness: three rules. *Evolutionary*  
*Ecology Research*, 10(2), 251-268.
- 714 Kingsolver, J. G., & Woods, H. A. (1997). Thermal sensitivity of growth and feeding in *Manduca*  
*sexta* caterpillars. *Physiological Zoology*, 70(6), 631-638.

- 716 Kingsolver, J. G. (2009). The well-temperated biologist. (American Society of Naturalists Presidential Address). *The American Naturalist*, 174(6), 755-768. doi:10.1086/648310
- 718 Klomp, H. (1964). Intraspecific competition and the regulation of insect numbers. *Annual review of entomology*, 9(1), 17-40. Retrieved from <https://www.annualreviews.org/doi/pdf/10.1146/annurev.en.09.010164.000313>
- 720 Kozłowski, J. (2004). Can Optimal Resource Allocation Models Explain Why Ectotherms Grow Larger in Cold? *Integrative and Comparative Biology*, 44(6), 480-493.
- 722 Kukal, O., & Dawson, T. E. (1989). Temperature and food quality influences feeding behavior, assimilation efficiency and growth rate of arctic woolly-bear caterpillars. *Oecologia*, 79(4), 526-532. Retrieved from <https://link.springer.com/content/pdf/10.1007/BF00378671.pdf>
- 724 Le Bourlot, V. (2014). Compétition par interférence, température et dynamique des populations structurées: étude expérimentale et théorique chez le collembole *folsomia candida*. Doctorat. Paris 6, Paris.
- 728 Le Bourlot, V., Mallard, F., Claessen, D., & Tully, T. (2015). A simple graphical method for displaying structured population dynamics and STdiag, its implementation in an R package. *Soil Organisms*, 87(3), 203-213.
- 730 Le Bourlot, V., Tully, T., & Claessen, D. (2014). Interference versus exploitative competition in the regulation of size-structured populations. *The American Naturalist*, 184(5), 609-623.
- 732 Liefting, M., Hoffmann, A. A., & Ellers, J. (2009). Plasticity versus environmental canalization: population differences in thermal responses along a latitudinal gradient in *Drosophila serrata*. *Evolution*, 63(8), 1954-1963. doi:10.1111/j.1558-5646.2009.00683.x
- 736 Mallard, F., Farina, M., & Tully, T. (2015). Within species variation in long-term trajectories of growth, fecundity and mortality in the Collembola *Folsomia candida*. *Journal of Evolutionary Biology*, Epub, 1-9. doi:10.1111/jeb.12752
- 738 McConnachie, S., & Alexander, G. J. (2004). The effect of temperature on digestive and assimilation efficiency, gut passage time and appetite in an ambush foraging lizard, *Cordylus melanotus melanotus*. *Journal of Comparative Physiology B: Biochemical, Systemic, and Environmental Physiology*, 174(2), 99-105. doi:10.1007/s00360-003-0393-1
- 740 Nilsson-Örtman, V., Stoks, R., & Johansson, F. (2014). Competitive interactions modify the temperature dependence of damselfly growth rates. *Ecology*, 95(5), 1394-1406.
- 744

- 746 Ohlberger, J., Edeline, E., Vøllestad, L. A., Stenseth, N. C., & Claessen, D. (2011). Temperature-  
driven regime shifts in the dynamics of size-structured populations. *The American Naturalist*,  
748 177(2), 211-223. doi:10.1086/657925
- Persson, L., De Roos, A. M., Claessen, D., Byström, P., Lövgren, J., Sjögren, S., . . . Westman, E.  
750 (2003). Gigantic cannibals driving a whole-lake trophic cascade. *Proceedings of the National  
Academy of Sciences*, 100(7), 4035-4039. Retrieved from [http://www.pnas.org/content/pnas/  
752 100/7/4035.full.pdf](http://www.pnas.org/content/pnas/100/7/4035.full.pdf)
- Savage, V. M., Gillooly, J. F., Brown, J. H., West, G. B., & Charnov, E. L. (2004). Effects of body  
754 size and temperature on population growth. *The American Naturalist*, 163(3), 429-441.
- Stam, E. M., de Leemkule, M. A. V., & Ernsting, G. (1996). Trade-offs in the life history and energy  
756 budget of the parthenogenetic Collembolan *Folsomia candida* (Willem). *Oecologia*, 107(3),  
283-292. doi:10.2307/4221335
- 758 Tufte, E. R. (2001). *The visual display of quantitative information* (2nd ed.). Cheshire, Connecticut:  
Graphics Press. Retrieved from Amazon
- 760 Tully, T., D'Haese, C. A., Richard, M., & Ferrière, R. (2006). Two major evolutionary lineages re-  
vealed by molecular phylogeny in the parthenogenetic collembola species *Folsomia candida*.  
762 *Pedobiologia*, 50(2), 95-104. doi:10.1016/j.pedobi.2005.11.003
- Tully, T., & Ferrière, R. (2008). Reproductive flexibility: genetic variation, genetic costs and long-  
764 term evolution in a Collembola. *PLoS One*, 3(9), e3207. doi:10.1371/journal.pone.0003207
- Tully, T., & Lambert, A. (2011). The evolution of postreproductive life span as an insurance against  
766 indeterminacy. *Evolution*, 65(10), 3013-3020. doi:10.1111/j.1558-5646.2011.01347.x
- van Dooren, T. J. M., Tully, T., & Ferrière, R. (2005). The analysis of reaction norms for age and size  
768 at maturity using maturation rate. *Evolution*, 59(3), 500-506.
- Walczyńska, A., Kielbasa, A., & Sobczyk, M. (2016). 'Optimal thermal range' in ectotherms: Defini-  
770 ing criteria for tests of the temperature-size-rule. *J Therm Biol*, 60, 41-48. doi:10.1016/j.jtherb-  
io.2016.06.006
- 772 Walters, R. J., & Hassall, M. (2006). The temperature-size rule in ectotherms: may a general ex-  
planation exist after all? *The American Naturalist*, 167(4), 510-523.
- 774 Wickham, H. (2009). *ggplot2: Elegant Graphics for Data Analysis*. New York: Springer-Verlag.
- Willem, V. (1902). Note préliminaire sur les Collemboles des Grottes de Han et de Rochefort. *Ann.*

776 Soc. Ent. Belg, 46, 275-283.

Zuo, W., Moses, M. E., West, G. B., Hou, C., & Brown, J. H. (2011). A general model for effects of  
778 temperature on ectotherm ontogenetic growth and development. *Proceedings of the Royal Society B: Biological Sciences*, 279(1734), 1840-1846. doi:10.1098/rspb.2011.2000

## 780 **Supporting Information**

### **Supporting methods**

#### 782 **(i) The Collembola *Folsomia candida* as a model organism**

The Collembola *Folsomia candida* is a broadly distributed throughout the world. It is found in habitats such as decaying litter, rotting wood or in caves. It is easy to maintain in the laboratory, and can be bred in isolation or in populations in simplified microcosms with a fine control of temperature, humidity, food provisioning and density (Fountain & Hopkin, 2005). This species is known for its highly flexible phenotypic adjustments when experiencing a sudden change in density or resource abundance (Tully & Ferrière, 2008). As a parthenogenetic species, multiple individuals sharing the same genotype can easily be bred in different environmental conditions. We worked with two distinct genetic clonal lineages (labelled respectively TO and HA) with contrasted ecological history and bio-demographic strategies (Tully, D'Haese, Richard, & Ferriere, 2006; Tully & Ferrière, 2008; Tully & Lambert, 2011; Mallard et al., 2015): at 21°C at low density, HA individuals have on average a lower reproductive potential and a lower basal mortality than TO individuals and they reach a higher body length. But the ecological natural conditions in which these lineages are adapted are not known.

#### 796 **(ii) Rearing of isolated individuals and of populations at different temperatures**

Both isolated individuals and populations were kept in standard rearing boxes made of polyethylene vials (diameter 52 mm, height 65 mm) filled with a 30 mm layer of plaster of Paris mixed with 600 mL of Pébéo graphic® Chinese ink to increase visual detectability of light individuals against the dark background (Tully & Ferrière, 2008). Rearing boxes were kept in incubators (Velp FOC 225E, temperature controlled  $\pm 0.5^\circ\text{C}$ ) at six temperatures (6°, 11°, 16°, 21°, 26° and 29°C) at constant humidity (~100%) and in darkness. Food was provided in the form of small pellets of a mixture of dried yeast and agar in standardised concentration and volume (5000 mL water+80 mg agar+800 mg dried yeast, to produce pellets of 15  $\mu\text{L}$ ).

806 Isolated individuals came from new-borns that were isolated immediately after hatching and fed *ad libitum* during their whole life. We studied between 12 and 20 individuals per lineage and temperature (mean 15.4).

Populations were founded with 5 to 10 adults and were kept at the same temperatures as those

810 for isolated individuals (Figure 1). We were not able to maintain viable populations at 29°C be-  
cause at this temperature the collembola do not reproduce (Figure 2A). Between four and twelve  
812 populations were started for each lineage at each temperature (Figure S2).

### (iii) Measuring densities of large and small individuals.

814 We used the option *region = TRUE* of the *STdiag.measure* function to extract a region of the plot  
and get from it the number of individuals and the length of each individual during the periods of  
816 measurements. More specifically, for measurements of asymptotic body lengths we estimated the  
mean density of large individuals (which we called "adults") and small ones (also called "juven-  
818 iles") at the time of each measurement as the mean density during a five weeks period which in-  
cludes the week of the measurement, three weeks before and the week after the measurement  
820 (Figure 1, Figure 2B). We used five weeks periods to get average measurements of the density in-  
tegrating fluctuations of density that could occur during the period of stabilization of the mean  
822 body length of the studied cohorts. For growth rate measurements, the density of large and small  
collembola were estimated as the mean densities over the period of time on which the growth rate  
824 has been estimated.

We used the number of large individuals (on a log scale) to quantify the relationship between tem-  
826 perature and "adult" density (Figure 2B) and to further measure the strength of competition by  
quantifying the dependence of growth rate and asymptotic length to adult density (Figure 4). We  
828 used the logarithm of adult density as a proxy of the population state since adults represent on  
average 90% of the total "biosurface" (total surface of collembola estimated with our pictures) in  
830 our populations and since we knew from previous experiments that large individuals play a central  
role in the density dependent effects by outcompeting small individuals in resource acquisition (Le  
832 Bourlot, 2014; Le Bourlot et al., 2014).

Note that when two modes of large individuals could be identified (HA populations at 21°C, Figure  
834 S2), we only took into account the number of very large individuals (>1.5 mm) because we know  
from the previous experiments mentioned above that the large collembola dominates not only the  
836 juveniles but also the smaller adults.

### (iv) Measuring the mean growth rates and asymptotic body 838 lengths in populations

**Cohort growth rates.** To measure the growth rates of the cohorts on the structure-time diagrams  
840 (Figure S2), we adjusted a straight line rather than a growth curve because many cohorts that are



well distinguishable during their period of maximum growth are less well distinguishable before  
842 and after this period especially when they merge with other cohorts.

**Asymptotic body length.** We found no other reliable way to automatically measure the cohorts'  
844 asymptotic body lengths due to the complexity of the structure-time diagrams, especially when  
several cohorts fuse or when several modes of large collembola coexist (See the example in Fig-  
846 ure 1 and some populations such as TO\_21\_r2 in Figure S2).

## Supporting figures

848 Figure S1: Comparing methods to measure growth rates. To verify that the method used to measure the  
850 growth rates in populations provides estimates that we can safely and reliably compare to the ones made  
852 on isolated individuals, we have studied in details 14 cohorts than can be easily identified on the plots and  
854 we have extracted about 17 points on each of these cohort's growth trajectories. We used this dataset to  
856 compare growth rates estimated by eye on these cohorts with growth rates estimated by fitting a paramet-  
858 ric growth curve. More specifically, we fit smoothed spline growth curves on these 14 cohorts, using the  
860 *gcFitSpline* function from the *grofit* package (Type=Gompertz). These fits were done recursively with differ-  
862 ent values of the *smooth.gc* parameter (between 0 and 1) and for each of these values, we measured the R-  
squared and the slope of a regression between the growth parameters estimated by eye and the growth  
parameters estimated from the smoothed splines. The figure shows how varying the smooth parameter of  
the spline curves modifies the quality of the regression between the two types of measurements. The red  
curve shows the R-squared for different values of the smooth parameters. The blue curve quantifies how far  
the regression slope is from a slope of one. The R-squared reach values higher than 0.95 for *smooth.gc*  
parameter above 0.45 and a *smooth.gc* parameter of 0.57 minimizes the difference between the estimation  
of the slope (0.99) and one. Thus, to minimize potential bias between the two methods, we choose to use a  
smooth parameter of 0.57 to fit the growth curves of the isolated individuals.

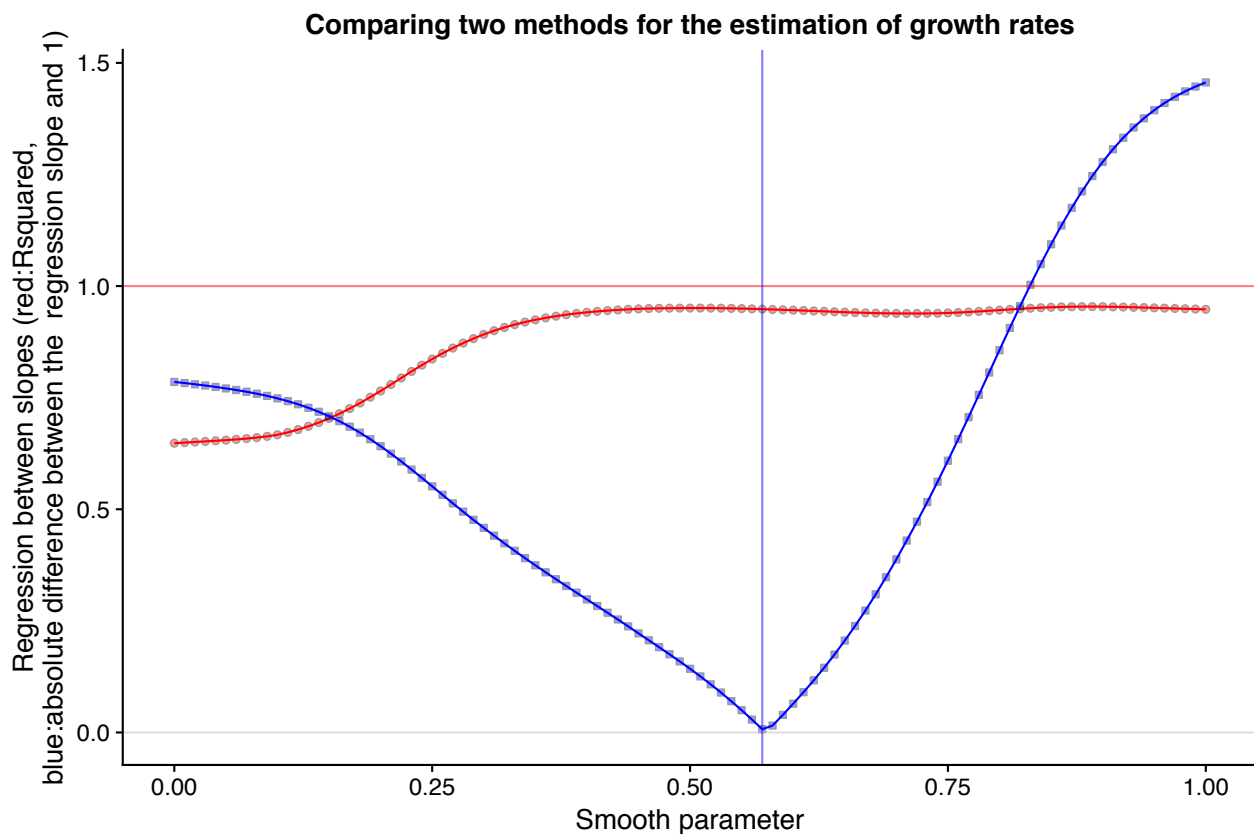

864

866 Figure S2: Structure time diagrams of 56 populations from two clonal lineages of Collembola (HA on the left  
868 side and TO on the right side) raised at five different temperatures (6, 11, 16, 21 and 26°C). The population  
870 labelled « HA\_06\_r1 » for example is the first population (replicate 1) of HA individuals raised at 6°C. Some  
872 populations became extinct and their dynamics are not plotted (ex. HA\_11\_r3). These diagrams display the  
874 temporal dynamics of the populations' size-structure: for each time (x-axis, number of days) and size class  
876 (y-axis, body length in mm) coordinate, a colour rectangle is plotted whose hue refers to the number of indi-  
878 viduals (on a log scale, scale on the right side of each plot). We used these diagrams to estimates the  
880 growth rate and asymptotic body length of cohorts. All these measurements were done using the function  
*STdiag.measure* from the R library *STdiag* that we specifically developed for this purpose (Le Bourlot V et  
al., 2015). This function is designed to interact with the structure-time diagram in order to obtain some  
quantitative measurements such as growth rate or average length of a group of individuals by clicking directly  
on the diagram. Note that a difficulty comes when measuring the asymptotic length from the remarkable  
plasticity of the springtails. They can resume growth or even shrink when the environmental conditions  
change (the density and structure of the populations change). To deal with this, we chose to focus on the  
mean length reached by a cohort right after it has stopped or significantly slowed down its growth even if  
the cohort can resume growth after a while when the population density changes for instance.

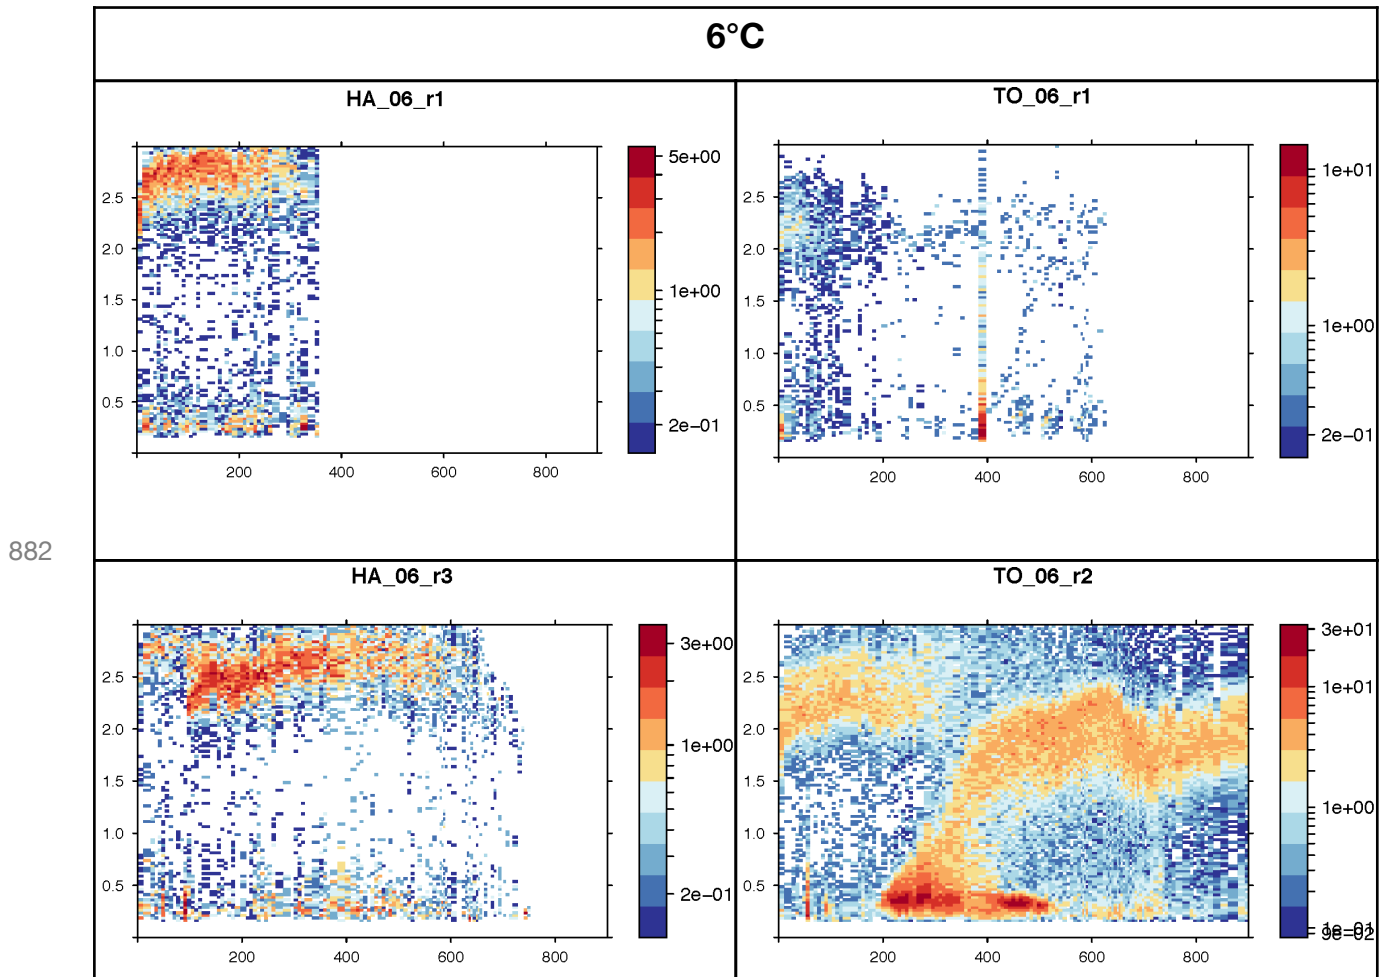

884

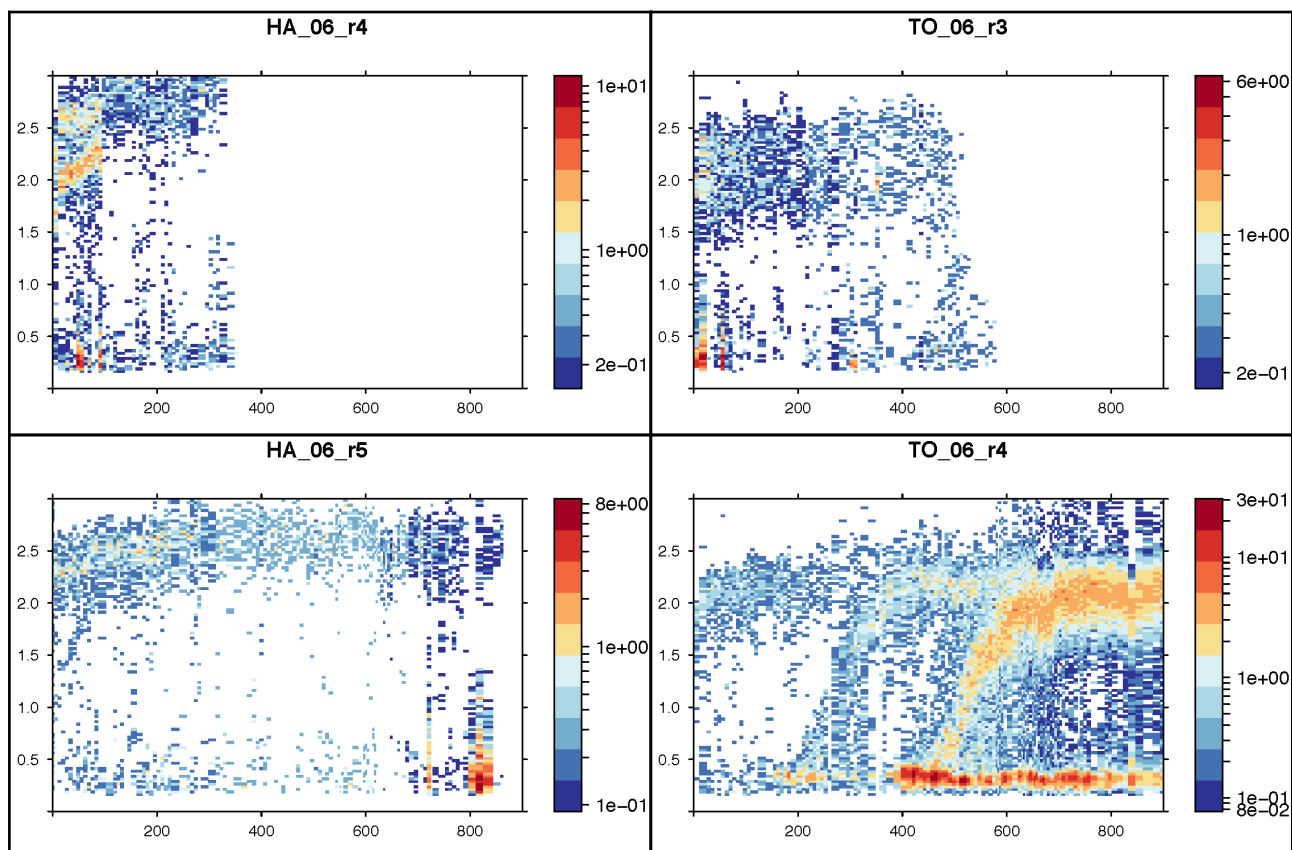

886

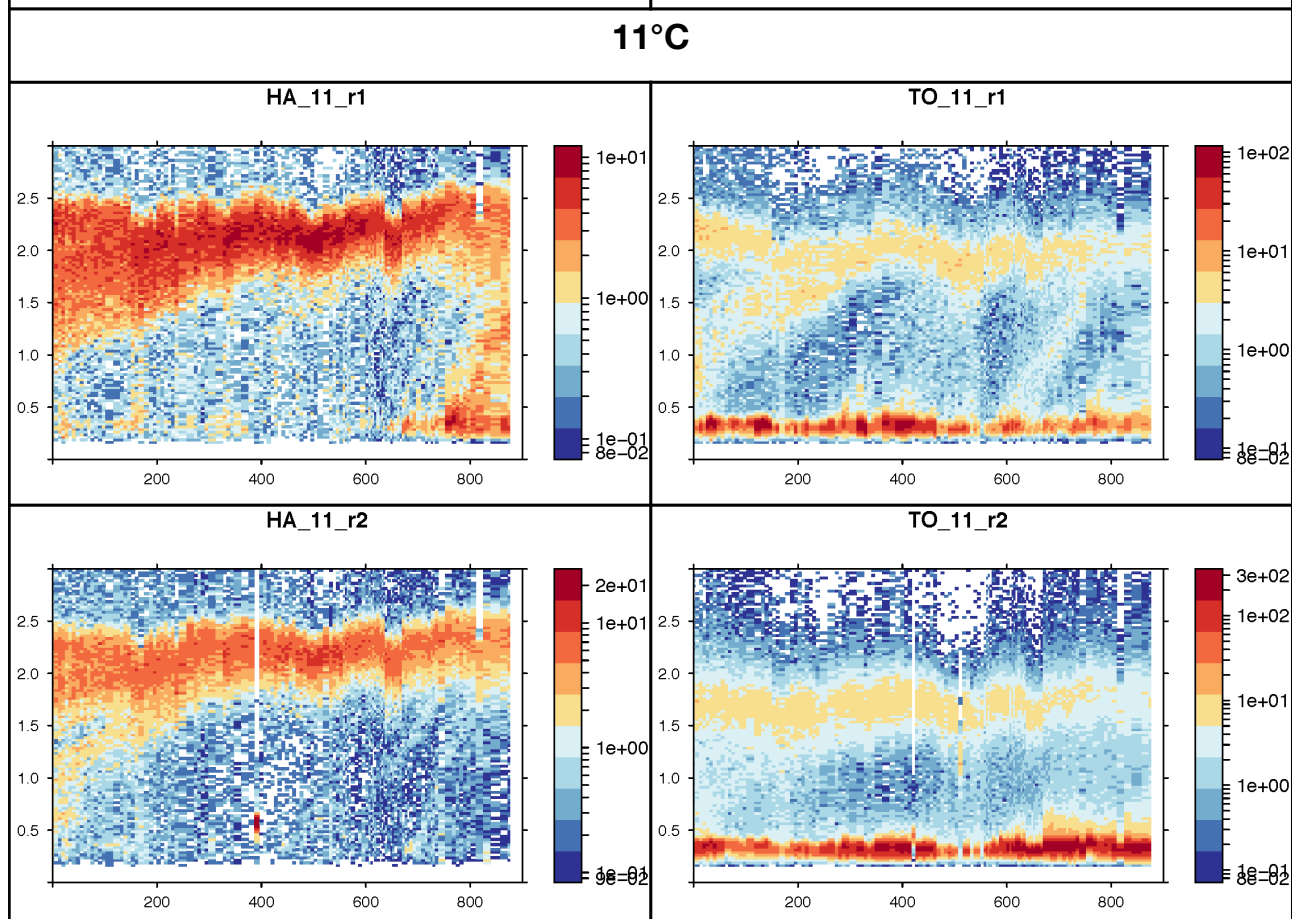

888

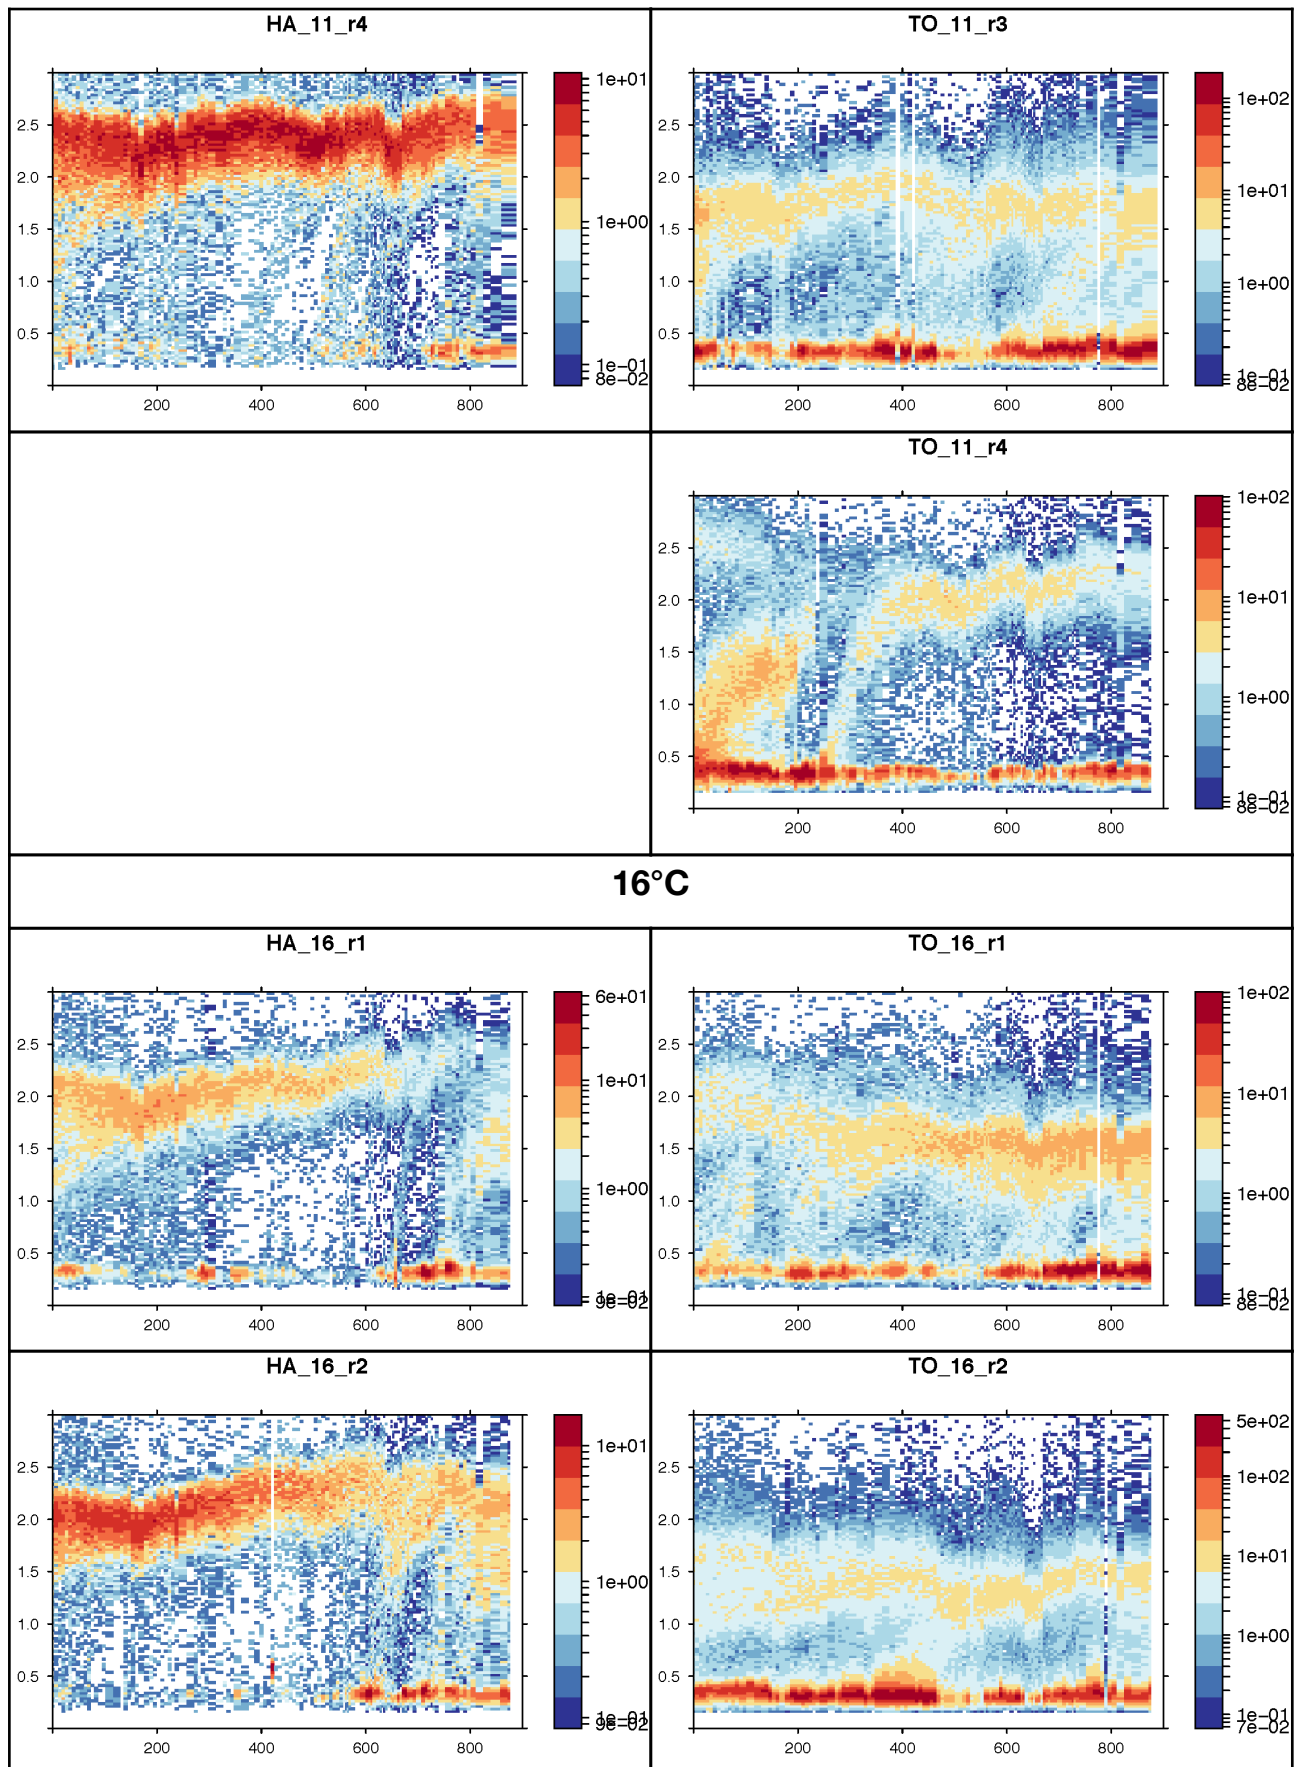

894

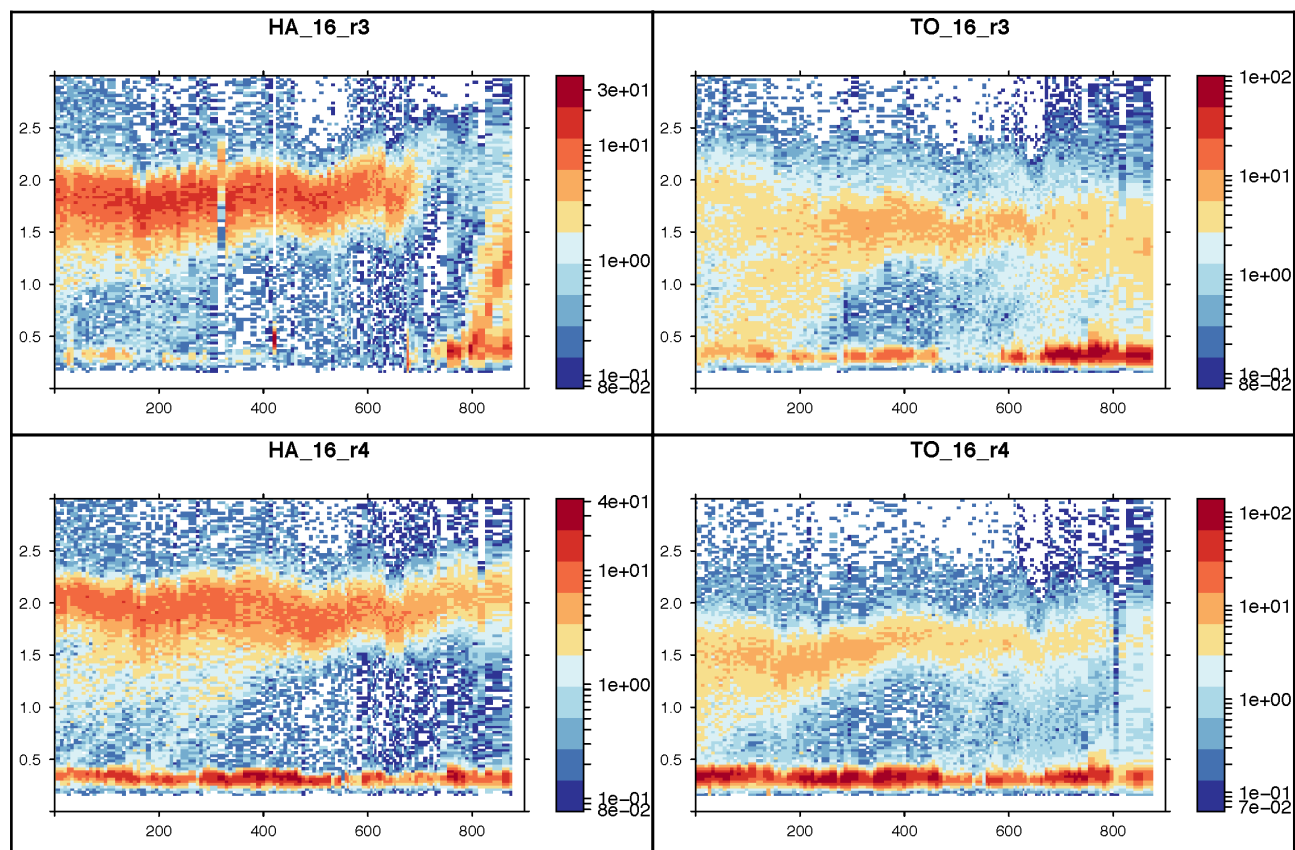

896

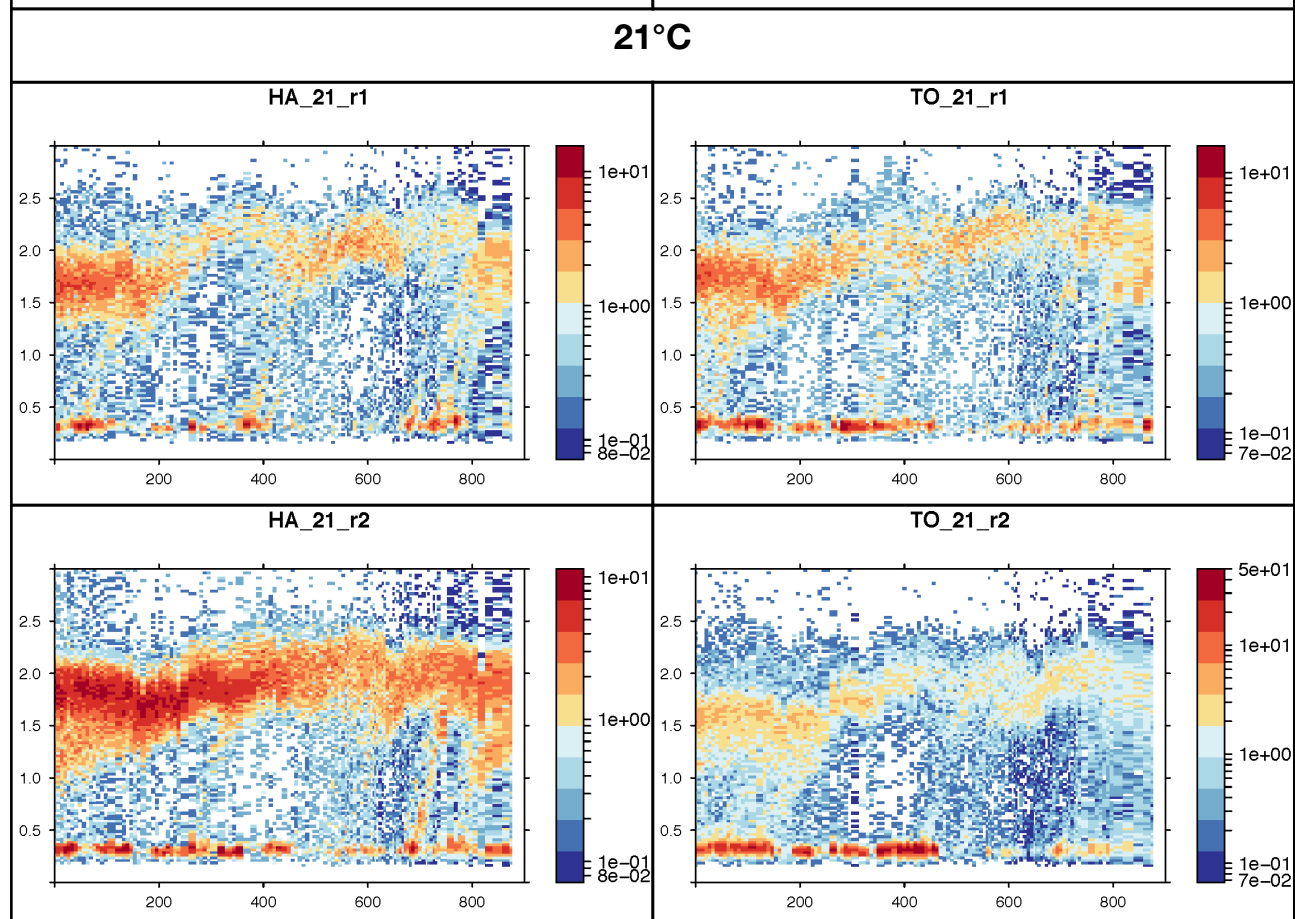

898

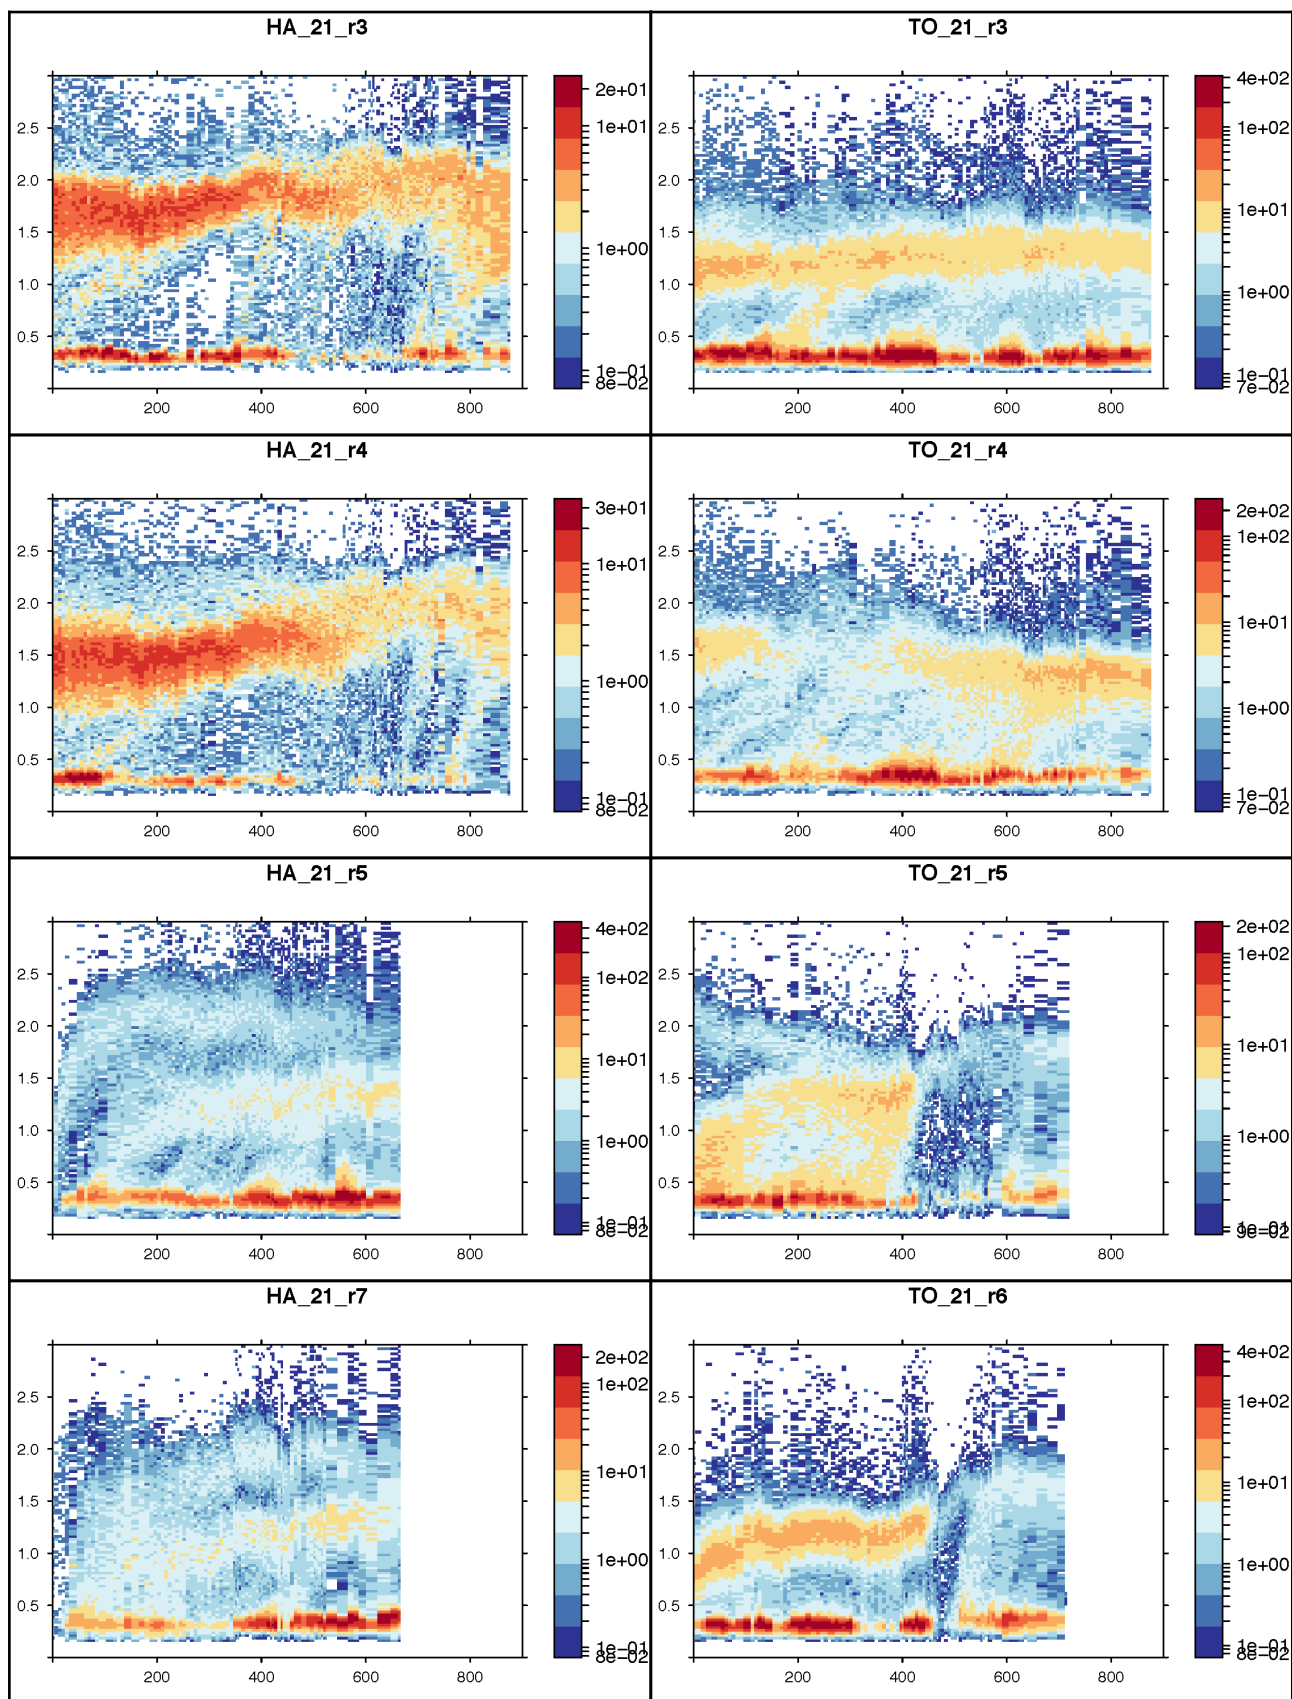

900

902

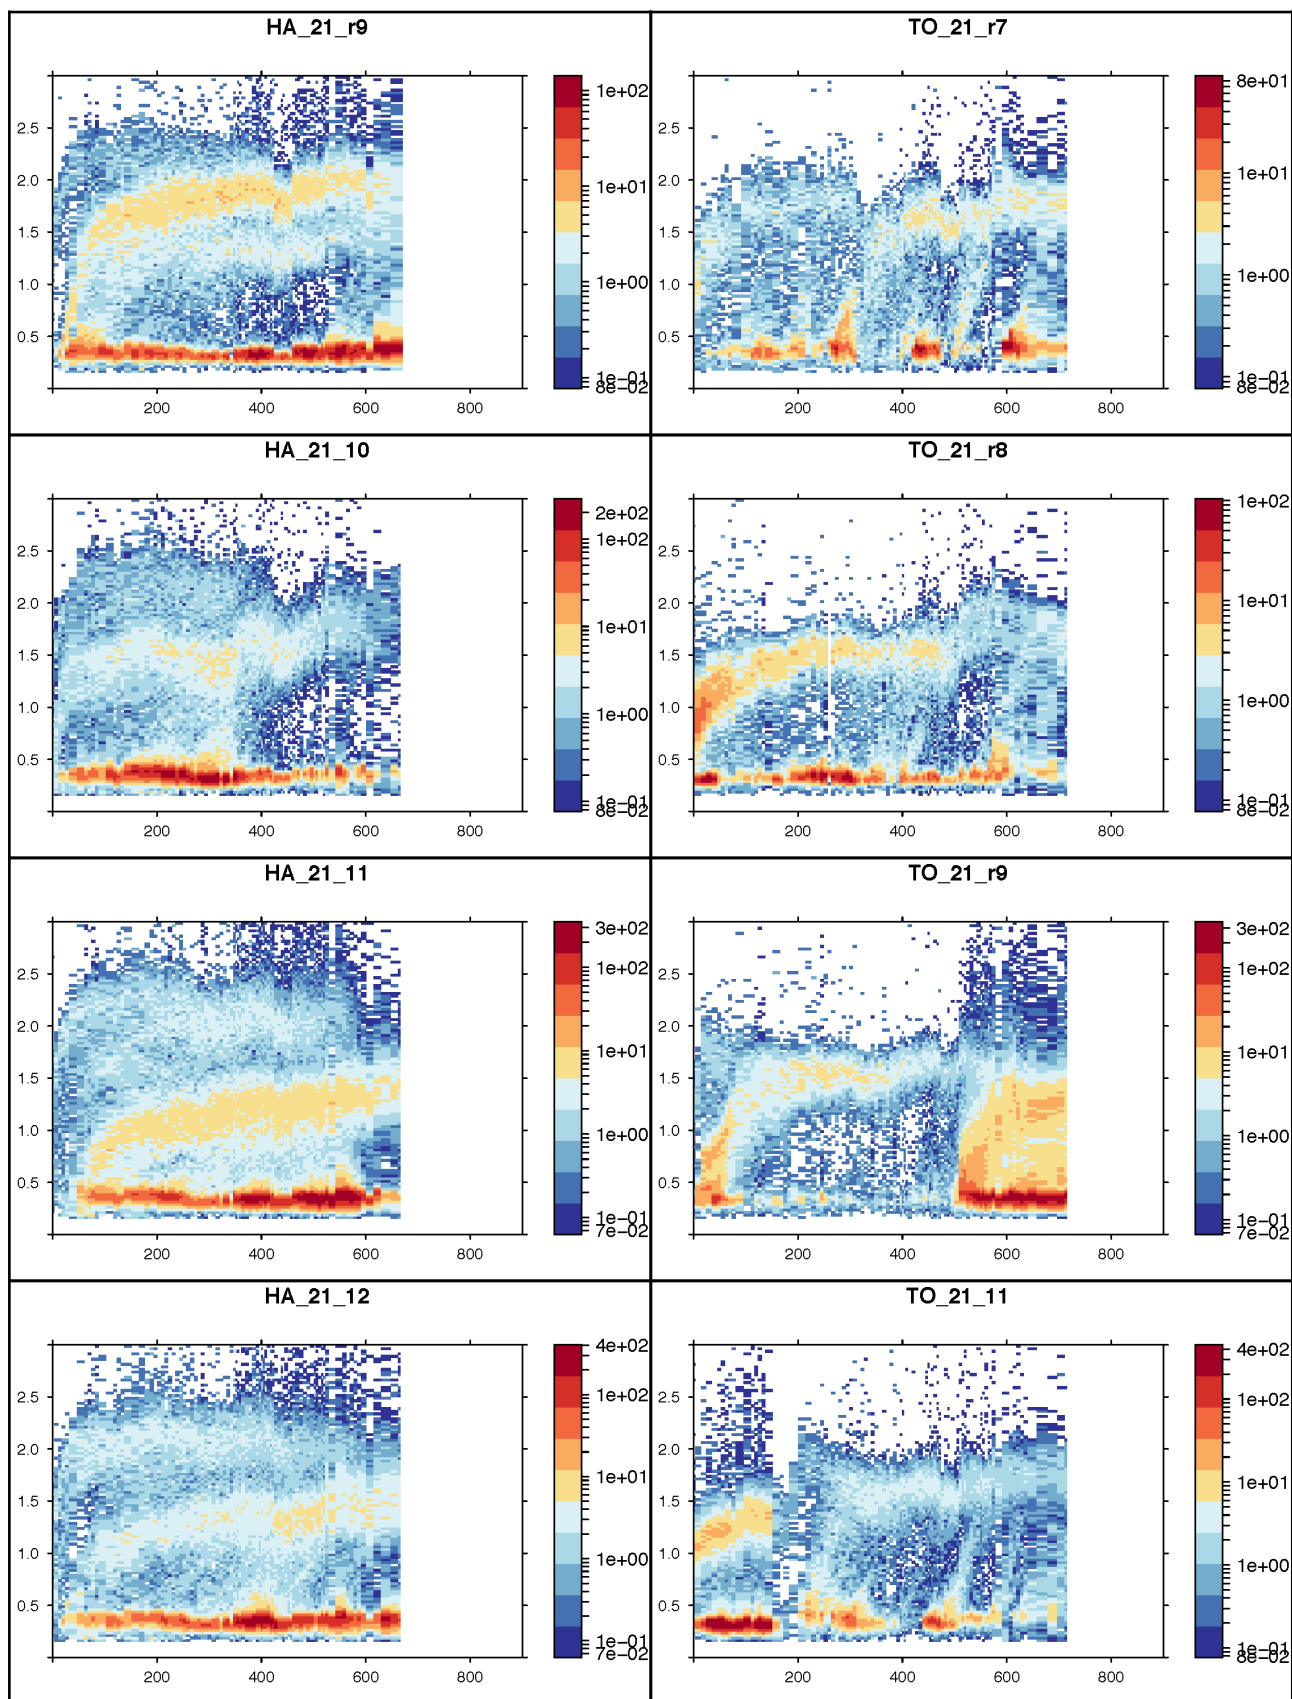

904

906



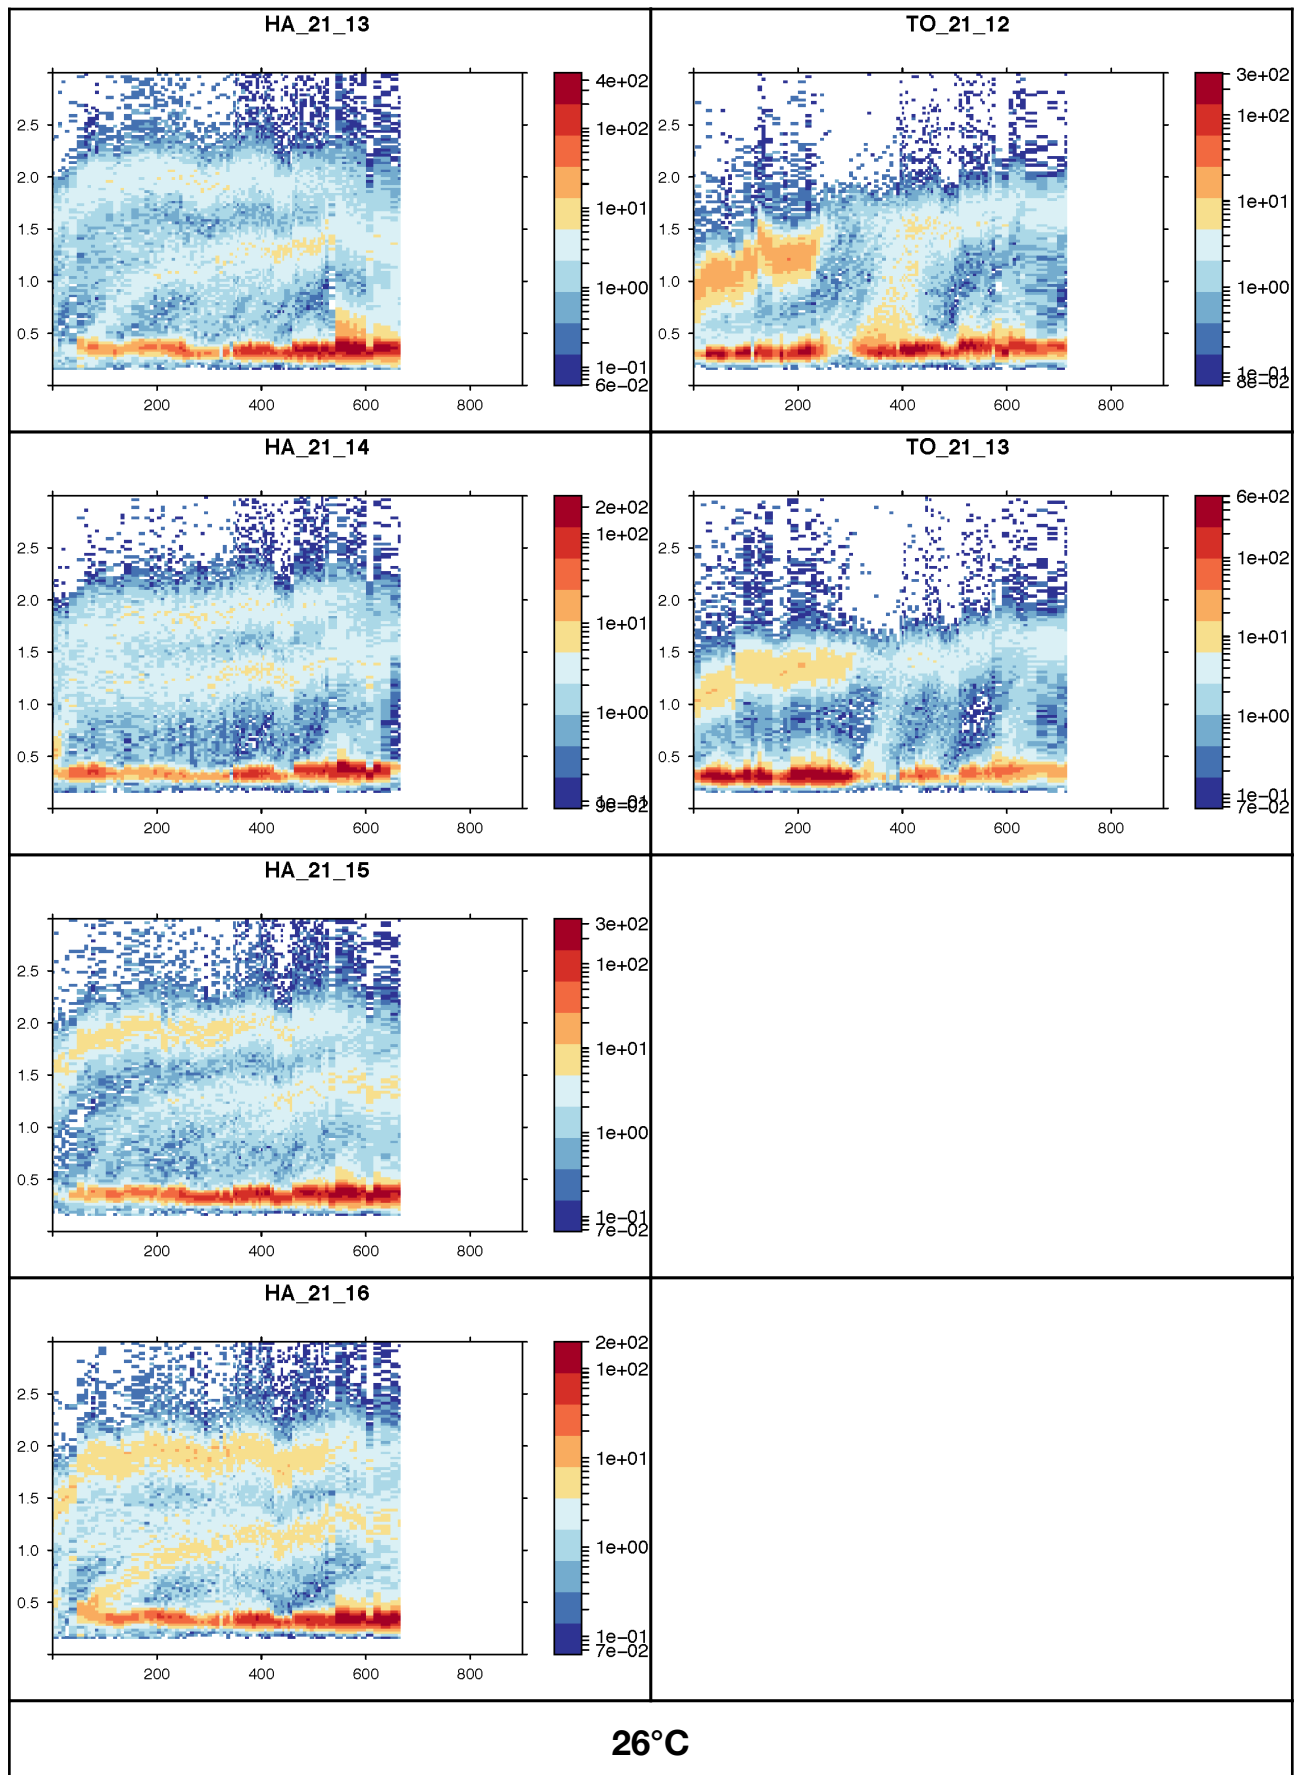

912

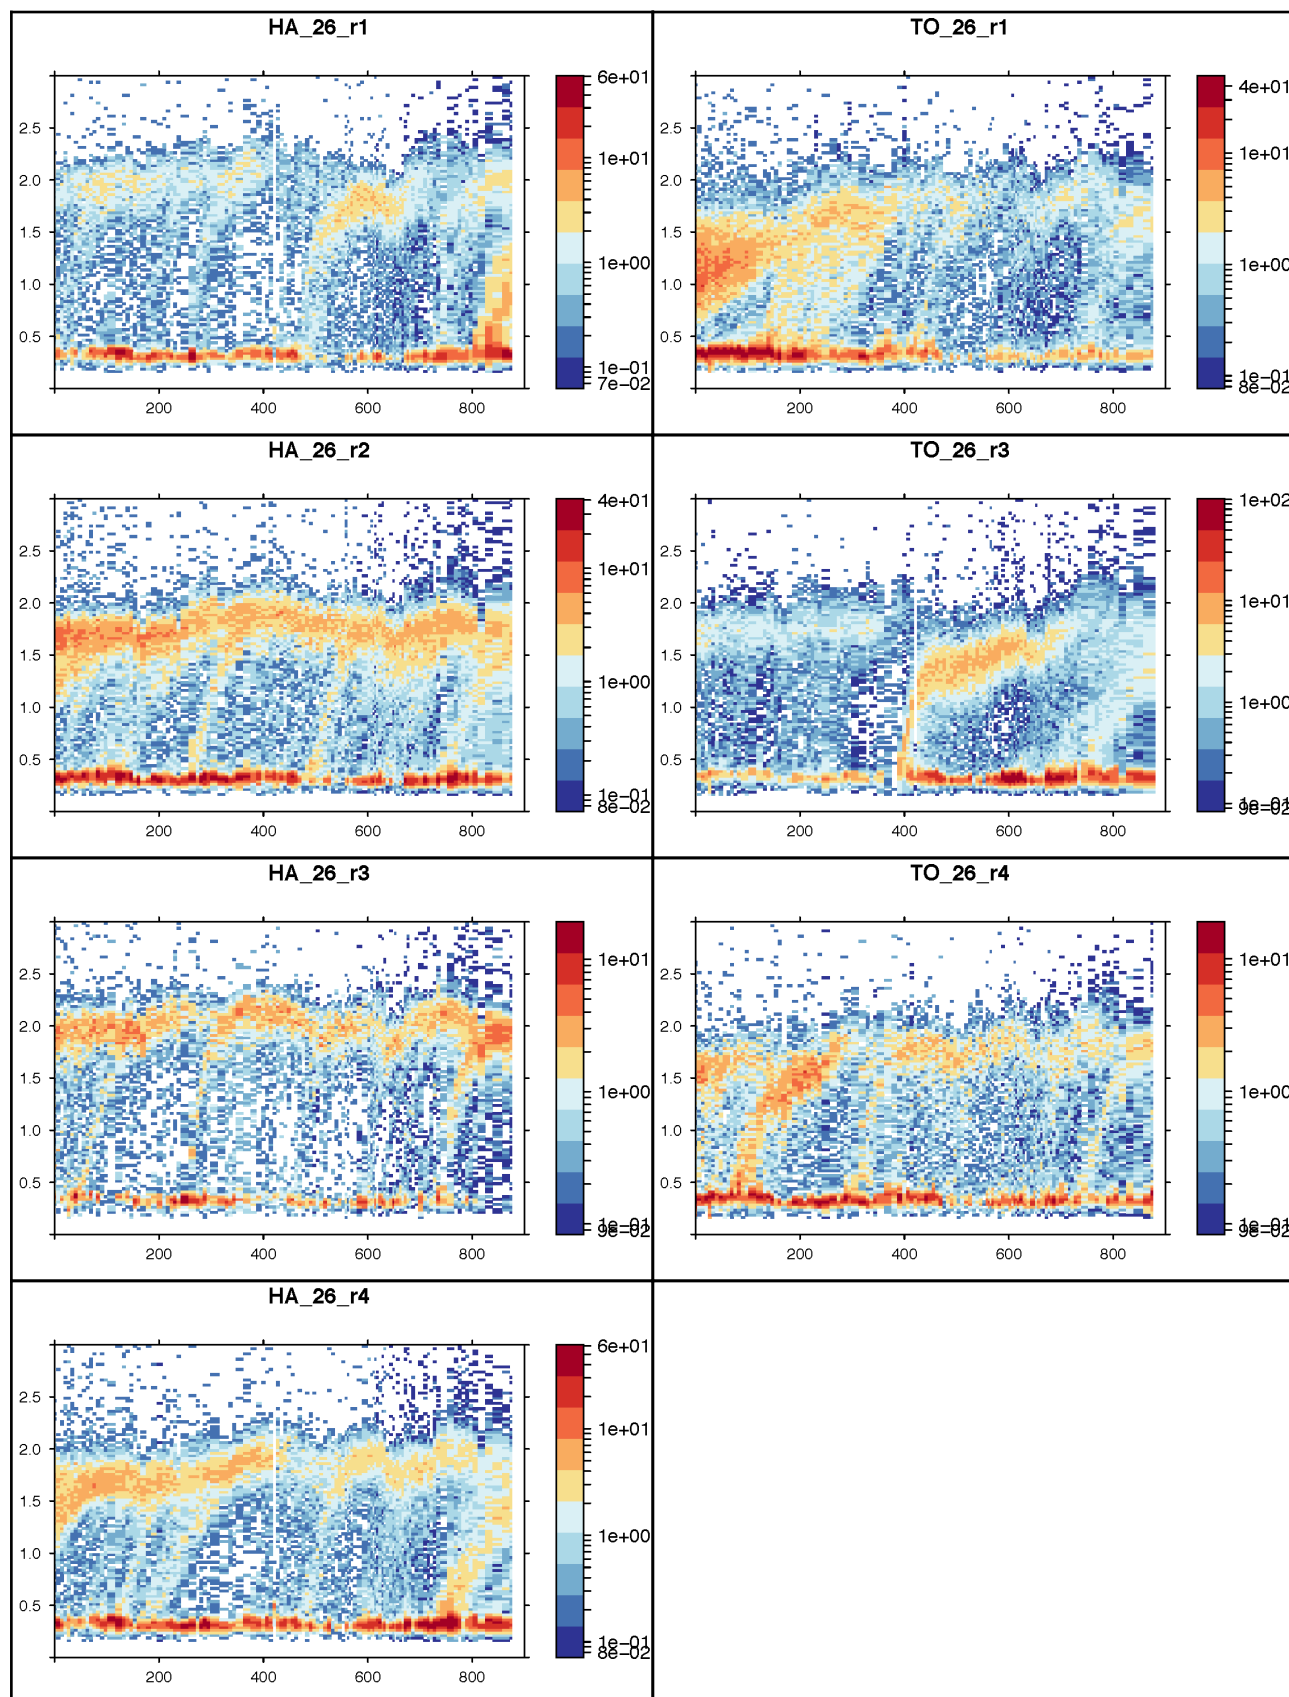

914

916 Figure S3: Two populations where different cohorts of juvenile recruiting in adults are visible. Black seg-  
918 ments are fitted on cohorts that are sufficiently contrasted to be used to do the growth measurements. Red  
arrows point toward other cohorts that are less distinguishable and that were not used to estimate their  
growth rates. The black dots show the measurements of asymptotic body lengths.

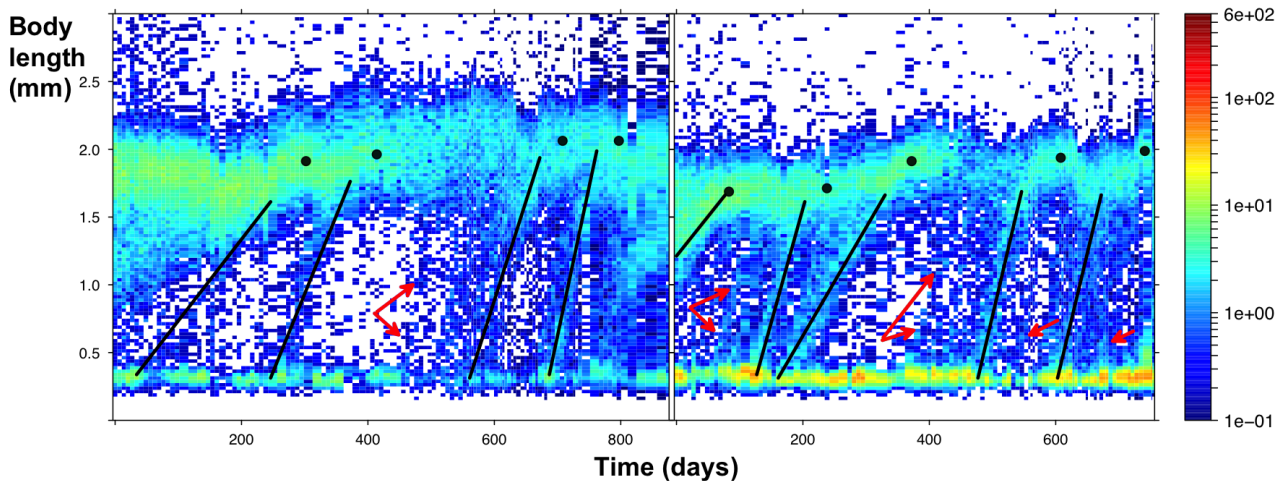

920

922 Figure S4: The effects of temperature on the clutch size produced by isolated individuals (A) and on juvenile  
924 density in populations (B) for lineages HA (open circle) and TO (grey diamonds). Panel A presents mean  
926 clutch sizes (mean numbers of eggs per clutch measured on 336 clutches, +/- 95% confidence interval) as  
a function of temperature. The TO lineage lay on average larger clutches than HA. The juvenile density in  
populations is plotted as a function of temperature on panel B (see methods for details). On average, there  
are more juveniles in TO populations than in HA ones.

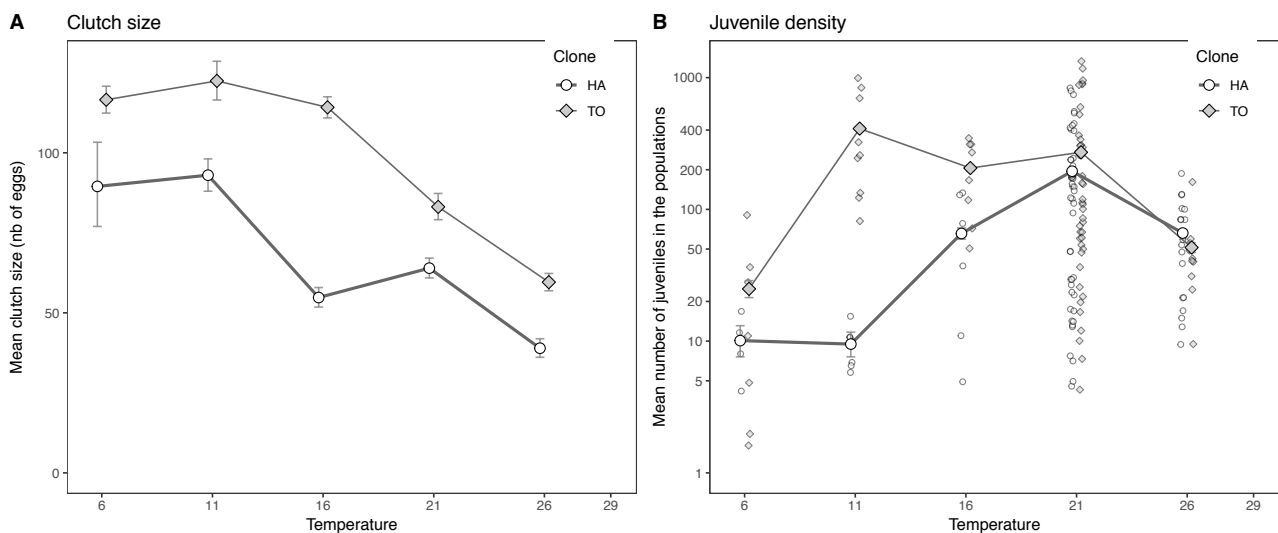

928 Figure S5: Relation between the adult biosurface (sum of the surface of all the adults in a box in mm<sup>2</sup>) and  
930 the adult density (number of adults per container) for the two lineages and at the five temperatures. For the  
same adult density, the biosurface of HA is higher than TO because on average in populations adults HA are  
larger than TO.

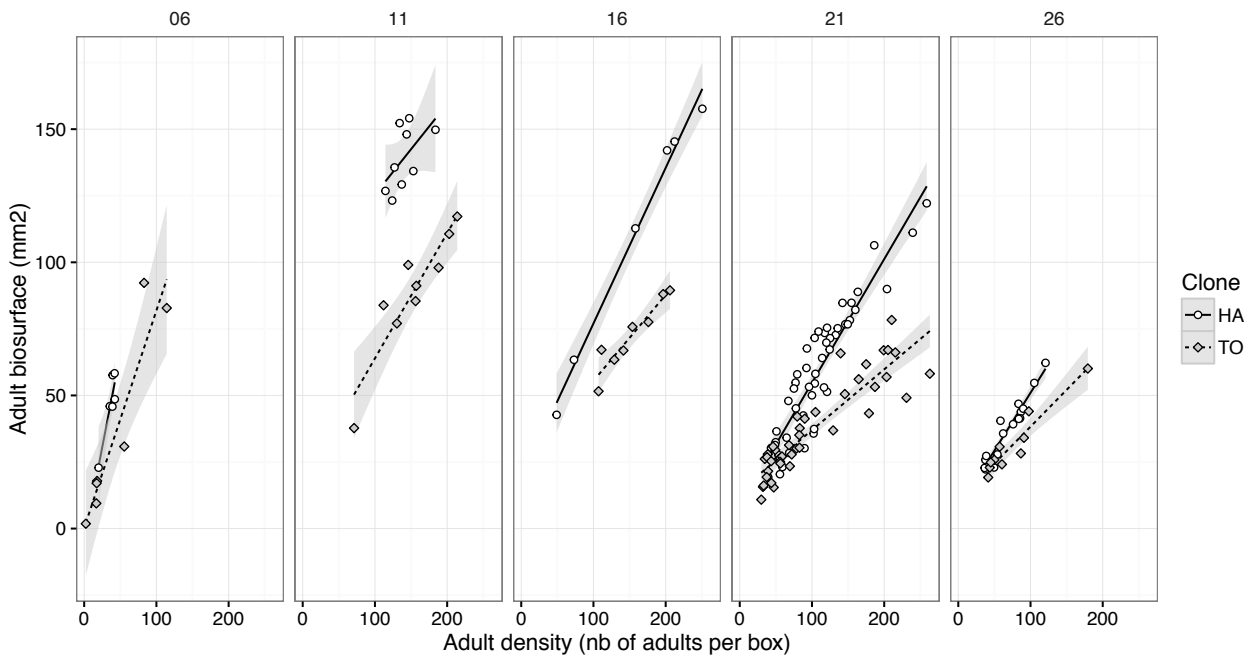

932

934 Figure S6: Trimodal body length distributions observed in some of HA populations raised at 21°C when the  
mean asymptotic size attained by some cohorts was measured (Figure S1). A kernel density estimation (red  
936 curve) has been fitted to the raw distribution (black histogram). The extremes of these red curves were used  
to automatically split each size distribution into three size classes separated here by black vertical lines.

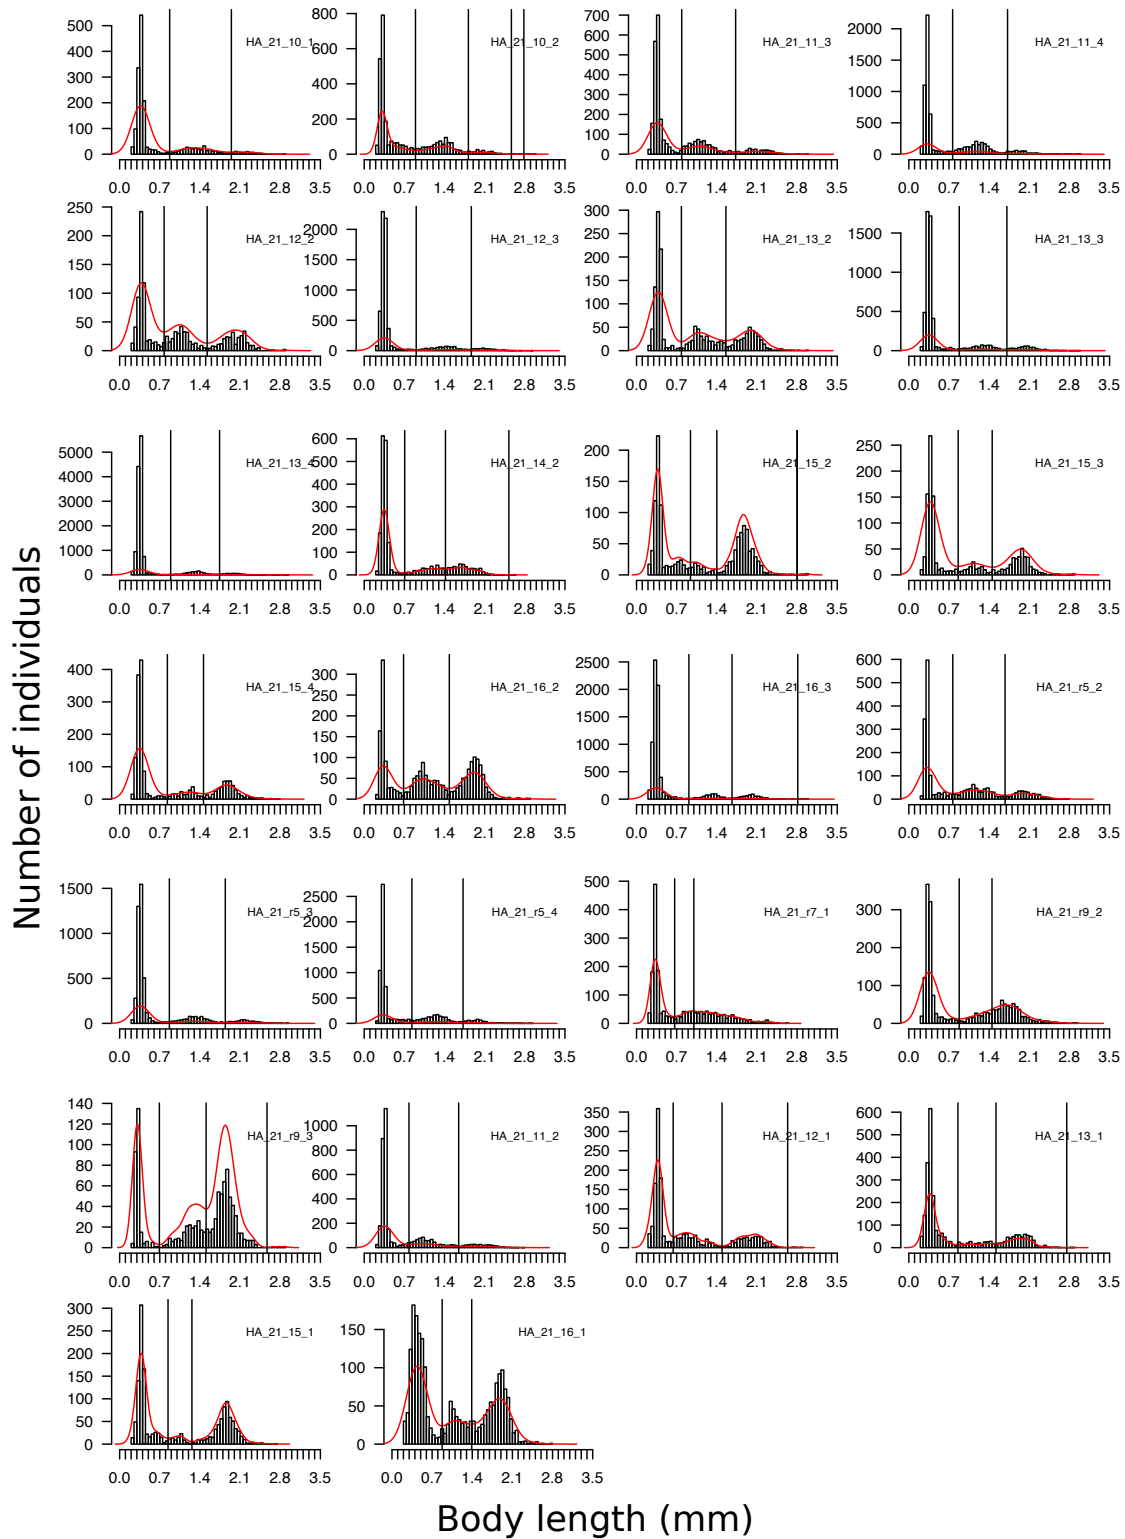

938 Figure S7: The visual display of the joint effect of temperature and density on growth rates and asymptotic  
940 body lengths using data measured on isolated individuals (Adult density of 1) and in populations. Panel A  
942 shows the positive effect of warming on growth rate and the additive negative effect of density (competition)  
944 on growth. One can also see that above a certain density, the isoclines become more or less horizontal.  
946 This means that, as the density increases, the temperature has less and less effects on the growth rates,  
948 the main variable that limits growth being the competition. Panel B shows that for the very low densities, the  
asymptotic length decreases with increasing temperature for both lineages. For TO, the interspecific  
competition has a negative effect on asymptotic length with an additive effect of temperature that remains  
on almost the whole range of conditions explored. For HA, the density has first a positive effect on asymptotic  
length: when the adult density increases between 1 and about 50 adults per container, the collembola  
tend to reach a longer asymptotic body length. But when the density continues to increase, its effect  
becomes negative (the isoclines are bended and their slopes change, B).

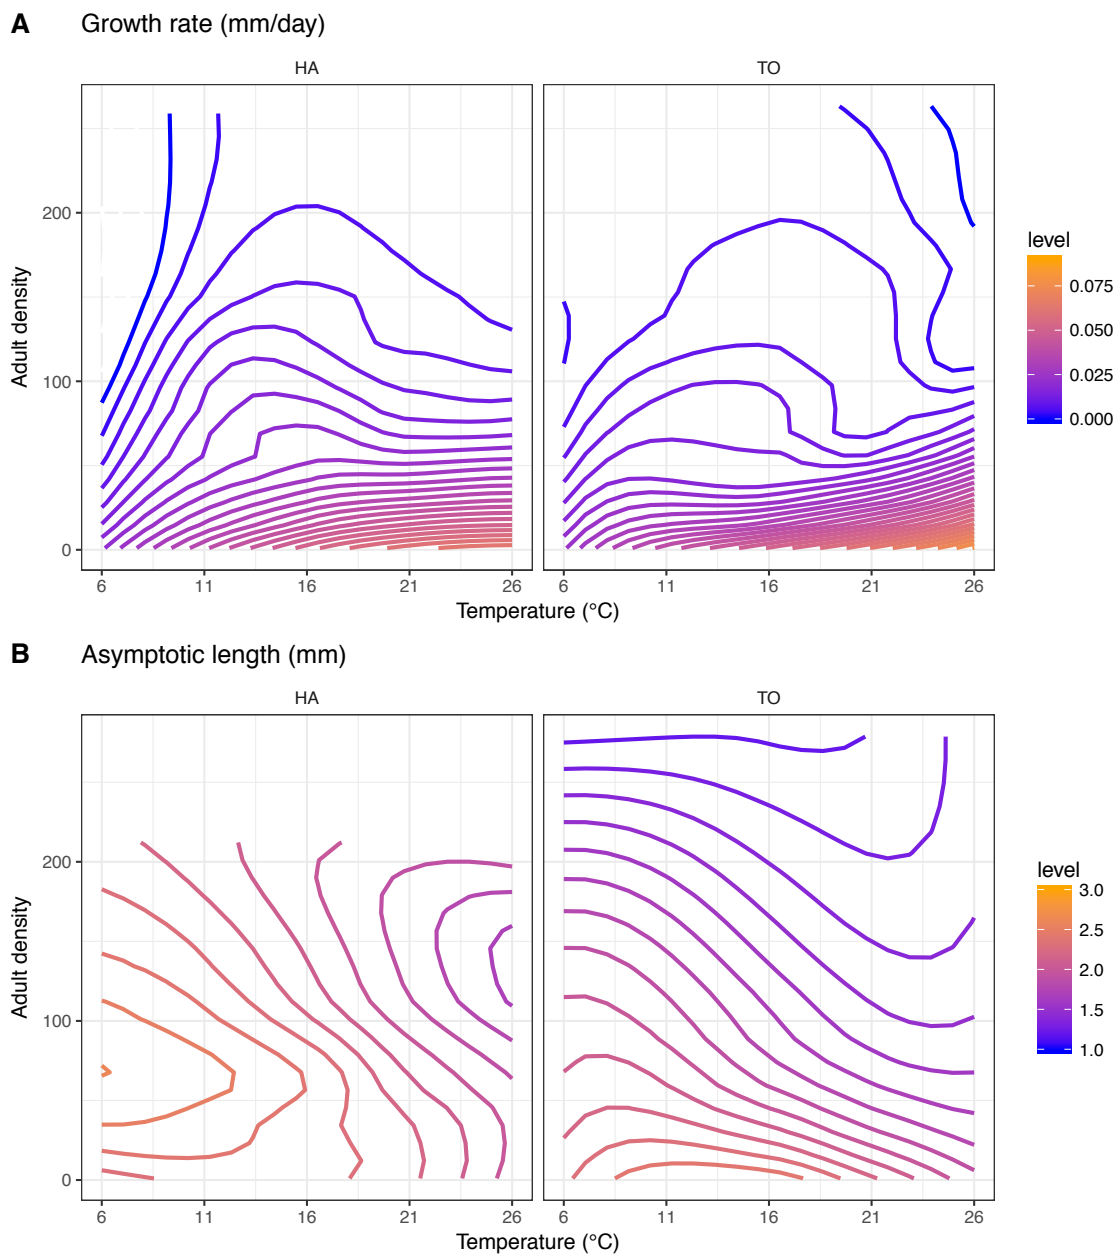

950

## Supporting tables

952 Table S1: Best selected linear models describing the effect of *adult density* (log scale), *temperature* (as a  
 954 factor) and *lineage* identity (HA and TO) on the *growth rate* (models A-C) and *asymptotic body length* (mod-  
 956 els D-F) measured in populations (Figure 4). Non-significant complex interactions that have been dropped  
 from the initial full models are italicized. Effects and their interactions are tested with likelihood ratio tests  
 using type 3 anova (*Anova* function from the *car* package). The main models (A, D) are associated with sub-  
 models (B-C, E-F) for each of the two lineages.

| Factors                                                   | Likelihood ratio Chi-square | Df | P (>Chisq) |
|-----------------------------------------------------------|-----------------------------|----|------------|
| <b>(A) Growth rate in populations (HA &amp; TO)</b>       |                             |    |            |
| Lineage (HA/TO)                                           | 13.2                        | 1  | <0.001     |
| Temperature (factor)                                      | 32.5                        | 4  | <0.001     |
| Adult density (log)                                       | 26.1                        | 1  | <0.001     |
| Lineage*Temperature                                       | 24.2                        | 4  | <0.001     |
| Lineage*Adult density (strength competition HA>TO)        | 23.1                        | 1  | <0.001     |
| Temperature*Adult density                                 | 12.1                        | 4  | 0.017      |
| <i>Lineage*Temperature*Density</i>                        | 2.4                         | 4  | 0.66       |
| <b>(B) Growth rate in populations (HA)</b>                |                             |    |            |
| Temperature (factor)                                      | 80.1                        | 4  | <0.001     |
| Adult density (log)                                       | 124.4                       | 1  | <0.001     |
| <i>Temperature*Adult density</i>                          | 9.2                         | 4  | 0.057      |
| Temperature (factor) > 6°C                                | 6.7                         | 3  | 0.08       |
| Adult density (log) > 6°C                                 | 123.8                       | 1  | <0.001     |
| <i>Temperature*Adult density</i>                          | 6.8                         | 3  | 0.08       |
| <b>(C) Growth rate in populations (TO)</b>                |                             |    |            |
| Temperature (factor)                                      | 10.9                        | 4  | 0.027      |
| Adult density (log)                                       | 37.6                        | 1  | <0.001     |
| <i>Temperature*Adult density</i>                          | 4.88                        | 4  | 0.30       |
| Temperature (factor) > 6°C                                | 5.8                         | 3  | 0.12       |
| Adult density (log) > 6°C                                 | 41.5                        | 1  | <0.001     |
| <i>Temperature*Adult density</i>                          | 3.3                         | 3  | 0.35       |
| <b>(D) Asymptotic length in populations (HA &amp; TO)</b> |                             |    |            |
| Lineage (HA>TO)                                           | 36.8                        | 1  | <0.001     |
| Temperature (factor)                                      | 41.3                        | 4  | <0.001     |
| Adult density (log)                                       | 0.01                        | 1  | 0.95       |
| Lineage*Temperature                                       | 12.2                        | 4  | 0.016      |
| Temperature*Adult density                                 | 70.3                        | 4  | <0.001     |
| <i>Lineage*Adult Density</i>                              | 0.4                         | 1  | 0.5        |
| <i>Lineage*Temperature*Density</i>                        | 2.3                         | 4  | 0.68       |

|      |                                                  |       |   |        |
|------|--------------------------------------------------|-------|---|--------|
|      | <b>(E) Asymptotic length in populations (HA)</b> |       |   |        |
| 996  | Temperature (factor)                             | 192.8 | 4 | <0.001 |
|      | Adult density (log)                              | 52.1  | 1 | <0.001 |
| 998  | <i>Temperature*Adult density</i>                 | 6.4   | 4 | 0.17   |
|      |                                                  |       |   |        |
| 1000 | <b>(F) Asymptotic length in populations (TO)</b> |       |   |        |
|      | Temperature (factor)                             | 34.4  | 4 | <0.001 |
| 1002 | Adult density (log)                              | 0.02  | 1 | 0.88   |
|      | Temperature*Adult density                        | 53.7  | 4 | <0.001 |



1004 Table S2: Model including the adult biosurface (sum of the surface of adults in populations) as a covariable  
 1006 rather than number of adults to explain the observed variations of cohort growth rates. When the total sur-  
 face of adults (biosurface) is taken into account rather than their number, the previously observed difference  
 1008 between the two lineages (significant interaction between lineage and density in model A in Table 3 sug-  
 gesting that the strength of competition is higher for HA) vanishes. This shows that the strength of competi-  
 tion is the same between the two lineages when controlling for adult size.

| Factors                                         | Likelihood ratio<br>Chi-square | Df       | P (>Chisq)  |
|-------------------------------------------------|--------------------------------|----------|-------------|
| <b>Growth rate in populations (HA &amp; TO)</b> |                                |          |             |
| Lineage (HA/TO)                                 | 2.2                            | 1        | 0.14        |
| Temperature (factor)                            | 38.0                           | 4        | <0.001      |
| Adult Biosurface (mm <sup>2</sup> )             | 6.1                            | 1        | 0.013       |
| Lineage*Temperature                             | 19.6                           | 4        | <0.001      |
| Temperature*Biosurface                          | 17.5                           | 1        | 0.0015      |
| <i>Lineage*Biosurface</i>                       | <i>0.67</i>                    | <i>1</i> | <i>0.41</i> |
| <i>Lineage*Temperature* Biosurface</i>          | <i>2.0</i>                     | <i>4</i> | <i>0.73</i> |

1020 Table S3: This table gathers the estimates (mean and 95% confidence interval in brackets) of the paramet-  
 1022 ers of models A (growth rate) and B (asymptotic body length) from Table 1. The predicted asymptotic body  
 length of the clone HA in the population raised at 6°C is 2.54mm. At 21°C, the predicted asymptotic size of  
 isolated TO is 2.3 mm (2.54-0.89-0.46-0.37+0.43+1.03+0.64-0.62=2.3).

|                                     | Growth rate (µm/day) | Asymptotic body length (mm) |
|-------------------------------------|----------------------|-----------------------------|
| 1024 Intercept (6°, HA, population) | 8 [2.7 ; 13.3]       | 2.54 [2.31 ; 2.76]          |
| 11°                                 | 1.9 [-4.9 ; 8.7]     | -0.19 [-0.47 ; 0.09]        |
| 1026 16°                            | 3.7 [-3.7 ; 11.2]    | -0.44 [-0.75 ; -0.14]       |
| 21°                                 | 3.8 [-1.8 ; 9.4]     | -0.89 [-1.13 ; -0.66]       |
| 1028 26°                            | 13.2 [7.1 ; 19.2]    | -0.62 [-0.88 ; -0.37]       |
| TO                                  | 5.6 [-1.6 ; 12.8]    | -0.46 [-0.75 ; -0.16]       |
| 1030 Isolated individual            | 15.7 [5.2 ; 26.3]    | -0.37 [-0.79 ; 0.05]        |
| TO 11°                              | -8.6 [-18 ; 0.9]     | -0.1 [-0.48 ; 0.28]         |
| 1032 TO 16°                         | -10 [-20.1 ; 0]      | -0.07 [-0.47 ; 0.33]        |
| TO 21°                              | -6 [-13.7 ; 1.7]     | 0.43 [0.12 ; 0.74]          |
| 1034 TO 26°                         | -11.4 [-20.2 ; -2.6] | 0.21 [-0.14 ; 0.57]         |
| Isolated individual 11°             | 10.9 [-1.9 ; 23.7]   | 0.32 [-0.18 ; 0.83]         |
| 1036 Isolated individual 16°        | 24.6 [11.5 ; 37.8]   | 0.61 [0.09 ; 1.13]          |
| Isolated individual 21°             | 38.1 [25.6 ; 50.7]   | 1.03 [0.54 ; 1.53]          |
| 1038 Isolated individual 26         | 27.7 [15.3 ; 40.1]   | 0.35 [-0.14 ; 0.84]         |
| TO Isolated                         | -5.6 [-18.3 ; 7]     | 0.64 [0.14 ; 1.14]          |
| 1040 TO Isolated individual 11°     | 14.5 [-1.9 ; 31]     | 0.12 [-0.53 ; 0.77]         |
| TO Isolated individual 16°          | 9.1 [-7.1 ; 25.3]    | 0.01 [-0.63 ; 0.65]         |
| 1042 TO Isolated individual 21°     | 11.8 [-5.3 ; 28.9]   | -0.62 [-1.29 ; 0.05]        |
| TO Isolated individual 26°          | 29 [13,5 ; 44,6]     | -0,4 [-1,02 ; 0,21]         |
